# Supplementary material for: Mindfulness-Based Programs in the Workplace: a Meta-Analysis of Randomized Controlled Trials
Source: Springer Nature journal article supplement (doi:10.1007/s12671-020-01328-3), 2020-03-02
Supplement: MOESM1 [file 17757808]

**Supplemental Materials**

**Mindfulness-based programs in the workplace: A meta-analysis of randomized-controlled trials**

**by Vonderlin, R. et al., *submitted to Mindfulness***

**Appendix A** Study descriptions of included primary studies (pp. 2-73)

**Appendix B** Plots for all Review Outcomes: Forest Plots, Funnel Plots, Outlier (Cook’s distance) and Egger’s Test for Funnel Plot Asymmetry (Publication Bias) (pp. 74-97)

**Appendix C** Table of all moderator analyses (p. 98)

**Appendix D** Table of Risk of Bias ratings for included primary studies (pp. 99-102)

**Appendix E** PRISMA Checklist (pp. 102-104).

Appendix A: Study Descriptions

Aikens et al. (2014)

| **Citation** | Aikens, K. A., Astin, J., Pelletier, K. R., Levanovich, K., Baase, C. M., Park, Y. Y., & Bodnar, C. M. (2014). Mindfulness goes to work: Impact of an online workplace intervention. *Journal of Occupational and Environmental Medicine*, 56, 721-731. |
| --- | --- |
| **Aim of study** | “The objective of this study was to determine whether a mindfulness program, created for the workplace, was both practical and efficacious in decreasing employee stress while enhancing resiliency and well-being.” |
| **Methods** | **Study Design:** RCT |
| **Participants** | **Population:** general employees |
| **Sample Size (randomized):** N = 89 |
| **Age in Years, M(SD):** n.r.(n.r.); 18 - 65 |
| **Sex (% female):** n.r. |
| **Country:** Midland, Michigan, U.S. |
| **Type of company:** Chemical Company |
| **Programs** | **Number of Intervention Groups:** 1 |
| **Intervention Group No. 1:** Mindfulness Intervention group |
| Setting:in company or during traveling |
| Duration/Time: 7 weeks; 1x 1h-session/week; 1-2h home-practice/week |
| Kind of mindfulness:shortened program of traditional MBSR;  two components: focusing attention; acceptance, curiosity & openness |
| Delivery:online applied training |
| **Control Group No. 1:** Mindfulness waitlist-control group |
| Type of Control Group: Wait-list control group |
| **Outcomes** | **Time points for assessment:** pre-intervention; post-intervention; follow-up (6 months after treatment; only intervention group) |
| **Mindfulness:** Five Facets of Mindfulness Questionnaire (FFMQ; Baer, 2006): Observe, Describe, Act aware, Nonreact, Nonjudge |
| **Stress:** The Perceived Stress Scale (PSS-14; Cohen, 1983) |
| **Resilience:** Connor-Davidson Resilience Scale (CD-RISC; Singh, 2010) |
| **Work Engagement:** Shirom-Vigor-Scale (Shirom, 2003): Physical Strength, Cognitive liveliness, Emotional energy |
| **Lifestyle:** 6 self-formulated items |
| **Notes** | n.a. |

Alexander et al. (2015)

| **Citation** | Alexander, G. K., Rollins, K., Walker, D., Wong, L., & Pennings, J. (2015). Yoga for self-care and burnout prevention among nurses. *Workplace Health & Safety, 63*(10), 462-470. |
| --- | --- |
| **Aim of study** | “The purpose of this pilot-level randomized controlled trial was to examine the efficacy of to improve self-care and reduce burnout among nurses.” |
| **Methods** | **Study Design:** RCT |
| **Participants** | **Population:** Nurses |
| **Sample Size (randomized):** 40 |
| **Age in Years, M(SD):** 46,38 (10,23) |
| **Sex (% female):** 97,5% female |
| **Country:** USA |
| **Type of company:** hospital |
| **Programs** | **Number of Intervention Groups:** 1 |
| **Intervention Group No. 1:** yoga group |
| Setting: Environmental service department |
| Duration/Time: 8 weekly sessions |
| Kind of mindfulness: yoga and meditation |
| Delivery: in-class |
| **Control Group No. 1:** control group |
| Type of Control Group: waitlist control |
| **Outcomes** | **Time points for assessment:** pre-intervention, post-intervention |
| **Healthy behavior:** Health Promoting Lifestyle Profile II (HPLP II; Walker, & Hill-Polerecky, 1996) |
| **Mindfulness:** Freibourg Mindfulness Inventory (FMI; Walach et al., 2006) |
| **Burnout:** Maslach Burnout Inventory (MBI; Maslach, Jackson, & Leiter, 1986) |
| **Notes** | n.a. |

Allexandre et al. (2016)

| **Pub title** | Allexandre, D., Bernstein, A. M., Walker, E., Hunter, J., Roizen, M. F. & Morledge, T.J. (2016). A web-based mindfulness stress management program in a corporate call center - A randomized clinical trial to evaluate the added benefit of onsite group support. *Journal of Occupational and Environmental Medicine, 58*, 254-264. |
| --- | --- |
| **Aim of study** | “[…] to (1) assess whether the WSM program can be an effective and engaging stress management program in the workplace and (2) determine the extent to which adding group support improves engagement, retention, and effectiveness.” |
| **Methods** | **Study Design:** RCT |
| **Participants** | **Population:** Most employees are debt collectors. Other employees are customer service or fraud representatives. |
| **Sample Size (randomized):** 161 |
| **Age in Years, M(SD):** 40 (12,6) |
| **Sex (% female):** 83,2% |
| **Country:** Ohio |
| **Type of company:** call center |
| **Programs** | **Number of Intervention Groups:** 3 |
| **Intervention Group No. 1:** Online mindfulness stress reduction (WSM) |
| **Intervention Group No. 2:** WSM + weekly group meeting (WSMg1) |
| **Intervention Group No. 3:** WSM, weekly group meeting + expert clinical support (WSMg2) |
| Setting: Online (at home or at work), Group sessions at work, Sessions with clinical experts at work |
| Duration/Time: 8 weeks |
| Kind of mindfulness: The WSM program is an 8-week online, interactive, educational program based on mindfulness meditation. Details of the intervention have been described in Morledge et al. (2013) |
| Delivery: online, at work |
| **Control Group No. 1:** Wait-list control group (CTL) |
| Type of Control Group: wait-list control |
| **Outcomes** | **Time points for assessment:** baseline, post intervention (8 weeks), follow-up (16 weeks, 1 year) |
| **Perceived Stress:** Perceived Stress Scale (PSS; Cohen, Kamarck, & Mermelstein, 1983) |
| **Emotional exhaustion, professional efficacy:** Maslach Burnout Inventory – General Survey (MBI; Maslach, Jackson, & Leiter, 1996) |
| **Mindfulness:** Mindfulness Attention Awareness Scale (MAAS; Brown & Ryan, 2003) |
| **Emotional well-being, emotional role-functioning, vitality:** RAND Corporation’s Medical Outcomes Study Short Form-36 (Hays, Sherbourne, & Mazel, 1993) |
| **Notes** | n.a. |

Amutio et al. (2015)

| **Citation** | Amutio, A., Martínez-Taboada, C., Hermosilla, D., & Delgado, L. C. (2015). Enhancing relaxation states and positive emotions in physicians through a mindfulness training program: A one-year study. *Psychology, Health & Medicine*, 20, 720-731.  Amutio, A., Martínez-Taboada, C., Delgado, L. C., Hermosilla, D., & Mozaz, M. J. (2015a). Acceptability and effectiveness of a long-term educational intervention to reduce physicians' stress-related conditions. *Journal of Continuing Education in the Health Professions*, 35, 255-260. |
| --- | --- |
| **Aim of study** | “The present article focuses on the impact of a mindfulness-based stress reduction (MBSR) program on improving well-being (i.e. relaxation states and related positive emotions) in a longitudinal study for a period of one year.” |
| **Methods** | **Study Design:** RCT |
| **Participants** | **Population:** actively employed physicians |
| **Sample Size (randomized):** N = 42 |
| **Age in Years, M(SD):** 47.31(9.42) |
| **Sex (% female):** 57.1% female |
| **Country:** Basque Country (Spain) |
| **Type of company:** Medical College |
| **Programs** | **Number of Intervention Groups:** 1 |
| **Intervention Group No. 1:** experimental group |
| Setting:group training course with instructor, practice with CD |
| Duration/Time: 8 weekly sessions; 1x 8h retreat-session; 0,75h home-practice/day |
| Kind of mindfulness:MBSR program based on the psycho-educational model of Krasner et al. (2009) |
| Delivery:in-class |
| **Control Group No. 1:** control group |
| Type of Control Group: Wait-list control group |
| **Outcomes** | **Time points for assessment:** pre-intervention; post-intervention; follow-up (10 months after treatment; only intervention group) |
| **Mindfulness:** Five Facets of Mindfulness Questionnaire (FFMQ; Spanish version of Cebolla et al., 2012): Observe, Describe, Act aware, Nonreact, Nonjudge |
| **Relaxation:** Smith Relaxation States Inventory (SRSI-3; Smith, 2007c): basic relaxation, positive energy, mindfulness, transcendence |
| **Notes** | n.a. |

Ancona and Mendelson (2014)

| **Pub title** | Ancona, M. R., & Mendelson, T. (2014). Feasibility and preliminary outcomes of a yoga and mindfulness intervention for school teachers. *Advances in School Mental Health Promotion*, *7*, 156-170. |
| --- | --- |
| **Aim of study** | “This pilot study explored the feasibility and preliminary outcomes of a 6-session yoga and mindfulness intervention for teachers (p.158). The program’s aim is to provide stress management skills for teachers working in under-resourced areas with high levels of occupational stress.” (p.161) |
| **Methods** | **Study Design:** Pilot study, randomized on school level |
| **Participants** | **Population:** Elementary and middle school teachers |
| **Sample Size (randomized):** 43 |
| **Age in Years, M(SD):** 20 to 50 and older |
| **Sex (% female):** 81.4% |
| **Country:** Baltimore (USA) |
| **Type of company:** School |
| **Programs** | **Number of Intervention Groups:** 1 |
| **Intervention Group No. 1:** Intervention |
| Setting: in spacious, unused classrooms |
| Duration/Time: 6 sessions over three weeks 45min, twice per week Instruction to meditate at home and at work twice the day for 20min |
| Kind of mindfulness: The teacher intervention is based on HLF’s yoga and mindfulness curriculum for youth and was designed by Ali Smith, Atman Smith, and Andres Gonzalez, founders of the Holistic Life Foundation, Inc. (not by researchers, but by individuals with intimate knowledge of the target community. |
| Delivery: in school after lesson |
| **Control Group No. 1:** waitlist control group |
| Type of Control Group: waitlist control |
| **Outcomes** | **Time points for assessment:** pretest & posttest (after 3 weeks intervention), change score |
| **Teacher Stress:** Teacher Stress Inventory (TSI; Fimian, 1984) |
| **Emotional Burnout:** Subscale „Emotional Exhaustion“ of the Maslach Burnout Inventory-Educators Survey; Self-report (MBI-ES; Maslach et al., 1986) |
| **Notes** | n.a. |

Anderson et al. (1999)

| **Pub title** | Anderson, V. L., Levinson, E. M., Barker, W., & Kiewra, K. R. (1999). The effects of meditation on teacher perceived occupational stress, state and trait anxiety, and burnout. *School Psychology Quarterly*, *14*, 3. |
| --- | --- |
| **Aim of study** | “[…] the purpose of the current study was to assess the efficacy of a 5-week Standardized Meditation program as a means of daily stress management for teachers.” (p.9) |
| **Methods** | **Study Design:** RCT |
| **Participants** | **Population:** Full-time teachers from Pennsylvania, Illinois, and Missouri, teaching at elementary, middle or high school level |
| **Sample Size (randomized):** 91 |
| **Age in Years, M(SD):** 22-60 |
| **Sex (% female):** 85 % |
| **Country:** Pennsylvania, Illinois, and Missouri (USA) |
| **Type of company:** school |
| **Programs** | **Number of Intervention Groups:** 1 |
| **Intervention Group No. 1:** Experimental Group |
| Setting: at school and at home |
| Duration/Time: 5 weeks; 1,5h once per week |
| Kind of mindfulness: the “program in meditation was designed by the lead author based on programs thaught by the American Meditation Society; an introduction to the benefits of meditating, its application in the life of a teacher, instruction in a basic mantra meditation practice, instruction in a basic pranayama (breathing) practice, group practice of the techniques, discussion of experiences, and encouragement to establish a routine of regular practice.” |
| Delivery: instruction to meditate 20min twice daily at home and at school |
| **Control Group No. 1:** waitlist control group |
| Type of Control Group:waitlist control |
| **Outcomes** | **Time points for assessment:** pre, post (after 5 weeks), follow-up (after 9 weeks) |
| **Occupational stress:** The Teacher Stress Inventory (TSI; Fimian, 1988), self-report |
| **State Anxiety, Trait Anxiety:** State-Trait Anxiety Inventory for Adults (STAI-A; Spielberger, 2010) |
| **Perceived Burnout:** Maslach Burnout Inventory (2nd edition)-Educators Survey Version (Maslach et al., 1986) |
| **Notes** | n.a. |

Arredondo et al. (2017)

| **Pub title** | Arredondo, M., Sabaté, M., Valveny, N., Langa, M., Dosantos, R., Moreno, J., & Botella, L. (2017). A mindfulness training program based on brief practices (M-PBI) to reduce stress in the workplace: a randomised controlled pilot study. *International Journal of Occupational and Environmental Health, 23*, 40-51 |
| --- | --- |
| **Aim of study** | “the purpose of this pilot, controlled study was to assess in employee-volunteers the efficacy of an 8-weeks M-BIP training program in reducing stress and increasing mindfulness ability and increasing the HRV. Additionally the changes in self-compassion, decentering, and the burnout syndrome were assessed.” (p.2) |
| **Methods** | **Study Design:** RCT |
| **Participants** | **Population:** workplace sample at the private international clinical research organization company |
| **Sample Size (randomized):** 40 |
| **Age in Years, M(SD):** 36.6 (5.6) |
| **Sex (% female):** 77.5 % |
| **Country:** Barcelona, Spain |
| **Type of company:** private international clinical research organization company |
| **Programs** | **Number of Intervention Groups:** 1 |
| **Intervention Group No. 1:** Experimental Group |
| Setting: at the workplace |
| Duration/Time: 8 weeks; 1,5h once per week + 3hr. retreat |
| Kind of mindfulness: “The M-PBI is a mindfulness program with brief inte- grated practices. It is based on progressive experiential learning that promotes the practice of focusing attention on a particular object (such as the breath or body sensa- tions), in order to increase the ability of the mind to be in the present without reactivity. Moreover, it includes compassion, open awareness practices, and practices to improve the HRV.” |
| Delivery: at the workplace |
| **Control Group No. 1:** waitlist control group |
| Type of Control Group:waitlist control |
| **Outcomes** | **Time points for assessment:** pre, post (after 8 weeks), follow-up (after 12 weeks) |
| **Perceived stress:** Perceived Stress Scale (PSS; Cohen et al., 1983), self-report |
| **Mindfulness:** Five Facet Mindfulness Questionnaire (FFMQ; Baer et al., 2006) |
| **Self-Compassion:** Self-Compassion Scale (SCS; Neff 2003)  **Decentering:** Experiences Questionnaire-Decentering (EQ-D; Fresco et al., 2007)  **Burnout:** Maslach Burnout Inventory – General Survey (MBI-GS; Schaufeli et al. 1996)  **Heart Rate Variability:** To record all R-R intervals, a Polar® H7 hear rate sensor was used. |
| **Notes** | n.a. |

Asuero et al. (2014)

| **Pub title** | Asuero, A. M., Queraltó, J. M., Pujol‐Ribera, E., Berenguera, A., Rodriguez‐Blanco, T., & Epstein, R. M. (2014). Effectiveness of a mindfulness education program in primary health care professionals: A pragmatic controlled trial. *Journal of continuing education in the health professions, 34*, 4-12. |
| --- | --- |
| **Aim of study** | “This study assessed the effectiveness of a training program for primary  health care professionals designed to reduce burnout and mood disturbance, increase empathy, and develop  mindfulness.” (p.4) |
| **Methods** | **Study Design:** pragmatic RCT |
| **Participants** | **Population:** health care professionals |
| **Sample Size (randomized):** N = 68 |
| **Age in Years, M(SD):** 47(8); n.r. |
| **Sex (% female):** 92 |
| **Country:** Catalonia, Spain |
| **Type of company:** Hospital |
| **Programs** | **Number of Intervention Groups:** 1 |
| **Intervention Group No. 1:** Mindfulness Intervention group |
| Setting:at work |
| Duration/Time: 8 weeks; 1x 2.5h-session/week (plus a 1-day session of 8 hours) |
| Kind of mindfulness:modeled after the intensive phase of Krasner’s study; emphasis of mindfulness in everyday activities with contemplation-meditation exercises (mindfulness meditation with focus on the present-moment experience and contemplate nonjudgmentally bodily sensations, breathing, sounds, and thoughts) |
| Delivery:training applied inclass |
| **Control Group No. 1:** mindfulness waitlist-control group |
| Type of Control Group: waitlist control group |
| **Outcomes** | **Time points for assessment:** pre-intervention; post-intervention |
| **Mindfulness:** Five Facets of Mindfulness Questionnaire (FFMQ; Baer, Smith, Hopkins, Krietemeyer, & Toney, 2006): Observe, Describe, Act aware, Nonreact, Nonjudge |
| **Burnout:** Maslach Burnout Inventory (MBI); subscales: emotional exhaustion, depersonalization, and personal accomplishment |
| **Mood Disturbance:** short version of the Profile of Mood States (POMS) Questionnaire; subscales: tension-anxiety, depression-dejection, anger-hostility, vigor-activity, and fatigue-inertia |
| **Empathy:** Jefferson Questionnaire; subscales: compassionate care, perspective taking, and “standing in the patient’s shoes.” |
| **Notes** | n.a. |

Auseron (2018)

| **Pub title** | Auserón, G. A., Viscarret, M. R. E., Goñi, C. F., Rubio, V. G., & Pascual, P. P. (2018). Evaluación de la efectividad de un programa de mindfulness y autocompasión para reducir el estrés y prevenir el burnout en profesionales sanitarios de atención primaria. *Atención Primaria*, *50*, 141-150. |
| --- | --- |
| **Aim of study** | “[…] evaluate the effectiveness of a Mindfulness and Self-Compassion Program on the levels of stress and burnout in Primary Care health professionals.” |
| **Methods** | **Study Design:** RCT |
| **Participants** | **Population:** health care professionals |
| **Sample Size (randomized):** 45 |
| **Age in Years, M(SD):** 49,9 (8,2) |
| **Sex (% female):** 84,4% |
| **Country:** Spain |
| **Type of company:** Hospital |
| **Programs** | **Number of Intervention Groups:** 1 |
| **Intervention Group No. 1:** experimental group |
| Setting: n.r. |
| Duration/Time: 2.5h /week for 8 weeks |
| Kind of mindfulness: Mindfulness and Self-Compassion training program (MBSR & MSC) |
| Delivery: in-class |
| **Control Group No. 1:** control group |
| Type of Control Group: waitlist control |
| **Outcomes** | **Time points for assessment:** pre, post |
| **Mindfulness:** Five Facets of Mindfulness Questionnaire (FFMQ; Cebolla, García-Palacios, Banos, Botella, 2012) |
| **Stress:** Perceived Stress Questionnaire (PSQ; Sanz-Carrillo, García-Campayo, Rubio, Santed, Montoro, 2002) |
| **Compassion:** Self-Compassion Scale (SCS; Neff, 2003) |
| **Burnout:** Maslach Burnout Inventory (MBI; Seisdedos, 1997) |
| **Notes** | n.a. |

Baby et al. (2018)

| **Citation** | Baby, M., Gale, C., & Swain, N. (2018). A communication skills intervention to minimise patient perpetrated aggression for healthcare support workers in New Zealand: A cluster randomised controlled trial. *Health Soc Care Community, 27*, 170-181. Doi:10.1111/hsc.12636 |
| --- | --- |
| **Aim of study** | “This study aimed to evaluate the effect of an intervention (communication skills training) to reduce the experience of aggression for healthcare support workers.” |
| **Methods** | **Study Design:** RCT |
| **Participants** | **Population:** health care support workers |
| **Sample Size (randomized):** 127 |
| **Age in Years, M(SD):** NA |
| **Sex (% female):** 78% female |
| **Country:** New Zealand |
| **Type of company:** nongovernmental organizations (NGOs) and District Health Boards (DHB) |
| **Programs** | **Number of Intervention Groups:** 1 |
| **Intervention Group No. 1:** Mindfulness |
| Setting: group and online |
| Duration/Time: 4 sessions |
| Kind of mindfulness: Modules based on mindfulness programs developed by Kabat-Zinn (2003), Segal, Williams and Teasdale (2002), Shapiro, Astin, Bishop and Cordova (2005) and Harris (2009). Videos based on ‘Online Mindfulness Course for Pain’ (Leov, 2015) |
| Delivery: online |
| **Control Group No. 1:** “It’s all about communication” |
| Type of Control Group: active control |
| **Outcomes** | **Time points for assessment:** pre-intervention, post-intervention, 3 months follow up, 6 months follow up |
| **Perceived level of patient aggression:** Perception of Prevalence of Aggression Scale (POPAS-NZ; Oud, 2000) |
| **Psychological distress:** Kessler Psychological Distress Scale (K10; Kessler et al., 2003) |
| **Trauma:** Impact of Events Scale-Revised (IES-R; Weiss & Marmar, 1997) |
| **Interpersonal communication competence:** Interpersonal Communication Competence Scale (ICCS; Rubin & Marin, 1994) |
| **Notes** | n.a. |

Bartlett et al. (2017)

| **Pub title** | Bartlett, L., Lovell, P., Otahal, P., & Sanderson, K. (2017). Acceptability, feasibility, and efficacy of a workplace mindfulness program for public sector employees: a pilot randomized controlled trial with informant reports. *Mindfulness, 8*, 639-654. |
| --- | --- |
| **Aim of study** | “This study evaluated a pilot 5-week Mindfulness at Work Program (MaWP) for acceptability, feasibility, and efficacy in relation to stress and related mental health and productivity problems for public sector employees.” |
| **Methods** | **Study Design:** RCT |
| **Participants** | **Population:** public administration employees |
| **Sample Size (randomized):** 135 |
| **Age in Years, M(SD):** |
| **Sex (% female):** |
| **Country:** Australia |
| **Type of company:** Public services |
| **Programs** | **Number of Intervention Groups:** 1 |
| **Intervention Group No. 1:** Mindfulness at Work Pilot Intervention |
| Setting: interactive classes with an expert mindfulness teacher |
| Duration/Time: 5 weeks |
| Kind of mindfulness: Based on the guidebook *Mindfulness for Dummies* (Alidina & Adams, 2014) and the MBSR curriculum (Kabat-Zinn, 2013) |
| Delivery: in-class, at work |
| **Control Group No. 1:** Self-help information ressources |
| Type of Control Group: active control |
| **Outcomes** | **Time points for assessment:** pre intervention, post intervention (5 weeks) |
| **Mindfulness:** Mindful Attention and Awareness Scale (MAAS; Brown & Ryan, 2003) |
| **Stress:** Perceived Stress Scale (PSS-14; Cohen et al., 1983; Virgili, 2013) |
| **Psychological Distress:** Kessler-10 Scale (K-10; Kessler et al., 2005) |
| **Health related quality of life:** Assessment of Quality of Life (AQoL-4D; Hawthorne et al., 1999) |
| **Sleep quality:** Jenkins’ Sleep Scale (JSS; Jenkins et al., 1988) |
|  | **Job stressors (demand, control, security):** Household Income Labour Dynamics in Australia Survey (HILDA; Wooden et al., 2002) |
|  | **Productivity:** Total lost productive days |
| **Notes** | n.a. |

van Berkel et al. (2014)

| **Pub title** | van Berkel, J., Boot, C. R., Proper, K. I., Bongers, P. M., & van der Beek, A. J. (2014). Effectiveness of a worksite mindfulness-related multi-component health promotion intervention on work engagement and mental health: results of a randomized controlled trial. *PloS one, 9*, e84118. |
| --- | --- |
| **Aim of study** | “The aim of the present study was to evaluate the effectiveness of a worksite mindfulness-related multicomponent health promotion intervention on work engagement, mental health, need for recovery and mindfulness” (p.1) |
| **Methods** | **Study Design:** RCT |
| **Participants** | **Population:** employees from two Dutch research institutes |
| **Sample Size (randomized):** 257 |
| **Age in Years, M(SD):** Intervention Group: M = 46.0 (9.4); Control Group: M = 45.1 (9.6) |
| **Sex (% female):** Intervention Group: 63.6%; Control Group: 71.1% |
| **Country:** Netherlands |
| **Type of company:** governmental research institute |
| **Programs** | **Number of Intervention Groups:** 1 |
| **Intervention Group No. 1:** intervention group |
| Setting: online at home and at worksite outside working hours (4 to 17 participants per group) |
| Duration/Time: The total duration of the intervention was six months. The Mindful VIP intervention comprised 8 weeks of in-company mindfulness-related training (90 minutes per session) with homework exercises, followed by 8 sessions of e-coaching. |
| Kind of mindfulness: Mindful Vitality in practice (VIP) intervention (van Berkel, Proper, Boot, Bongers, & van der Beek) consisting of mindfulness training, e-coaching , and several supporting elements (ie, fruit and vegetables, lunch walking routes, a buddy system) |
| Delivery: online, in-class, hand-outs containing homework exercises, a mindfulness exercise booklet, and an audio disc with relaxation exercises |
| **Control Group No. 1:** control group |
| Type of Control Group: unspecified (ALL participants were granted access to an intranet webpage containing links to various health promotion activities of the participating research institutes, e.g, in-company fitness) |
| **Outcomes** | **Time points for assessment:** pre (baseline), post (6 months from baseline), follow-up (12 months from baseline) |
| **Work engagement:** Utrecht Work Engagement Scale’’ (UWES; Schaufeli, 2003) |
| **General mental health:** SF-36 Vitality Scale (Van der Zee, & Sanderman 1993) |
| **Need for Recovery:** 11-item Need for Recovery Scale (van Veldhoven & Broersen, 2003) |
| **Mindfulness:** MAAS (Brown & Ryan, 2003) |
| **Notes** | n.a. |

Bostock et al. (2018)

| **Citation** | Bostock, S., Crosswell, A. D., Prather, A. A., & Steptoe, A. (2018). Mindfulness on-the-go: Effects of a mindfulness meditation app on work stress and well-being. *Journal of occupational health psychology.* Advance online publication. |
| --- | --- |
| **Aim of study** | The purpose of this study was to examine the effects of a mindfulness meditation program delivered via smartphones on outcomes related to work stress. p 2 |
| **Methods** | **Study Design:** RCT |
| **Participants** | **Population:** mixed |
| **Sample Size (randomized):** 238 |
| **Age in Years, M(SD):** 35,5 (7,7) |
| **Sex (% female):** 59,2% female |
| **Country:** UK |
| **Type of company:** pharmaceutical and high tech companies |
| **Programs** | **Number of Intervention Groups:** 1 |
| **Intervention Group No. 1:** meditation |
| Setting: Headspace App, at work |
| Duration/Time: 8 weekly sessions |
| Kind of mindfulness: meditation |
| Delivery: audio, video, app |
| **Control Group No. 1:** control group |
| Type of Control Group: waitlist control |
| **Outcomes** | **Time points for assessment:** pre-intervention, post-intervention (10 weeks from baseline) |
| **Psychological well-being:** Warwick Edinburgh Mental Well-being Scale (Tennant et al., 2007)  **Daily well-being:** positive emotions ratings provided five times throughout 1 working day following daily diary methodology (Almeida, 2005; Bolger, Davis, & Rafaeli, 2003) |
| **Psychological distress:** Hospital Anxiety and Depression Scale (Zigmond & Snaith, 1983)  **Job strain:** Whitehall II Study Questionnaire (16 items) (Bosma et al., 1997; Kuper & Marmot, 2003)  **Workplace social support:** five statements ranked on a 4-point scale |
| **Notes** | n.a. |

Cheema et al. (2013)

| **Pub title** | Cheema, B. S., Houridis, A., Busch, L., Raschke-Cheema, V., Melville, G. W., Marshall, P. W., ... & Colagiuri, B. (2013). Effect of an office worksite-based yoga program on heart rate variability: outcomes of a randomized controlled trial. *BMC complementary and alternative medicine, 13*, 82. |
| --- | --- |
| **Aim of study** | “The purpose of this study was to determine if an office worksite-based hatha yoga program could improve physiological stress, evaluated via heart rate variability (HRV), and associated health-related outcomes in a cohort of office workers.” (p.1) |
| **Methods** | **Study Design:** RCT |
| **Participants** | **Population:** university staff |
| **Sample Size (randomized):** N = 37 |
| **Age in Years, M(SD):** 38(12); 21-58 |
| **Sex (% female):** 81.1 |
| **Country:** Sydney, Australia |
| **Type of company:** University of Western Sydney |
| **Programs** | **Number of Intervention Groups:** 1 |
| **Intervention Group No. 1:** Mindfulness Intervention group |
| Setting:in company |
| Duration/Time: 10 weeks; 3x 0.83h-session/week |
| Kind of mindfulness: Hatha yoga program (based on the Yoga Synergy Water Sequence, created by Simon Borg Olivier and Bianca Machliss) |
| Delivery:training applied inclass |
| **Control Group No. 1:** passive control group |
| Type of Control Group: passive control group |
| **Outcomes** | **Time points for assessment:** pre-intervention (week 0); post-intervention (week 11) |
| **HRV and heart rate:** high frequency spectral power component of HRV (measured in absolute units; ms2); heart rate: average number of beats per minute during the 10-minute recording |
| **Musculoskeletal fitness:** push-up test, side-bridge test, sit-and-reach  test |
| **Quality of Life:** Medical Outcomes Trust Short-form 36 Health Status Questionnaire (SF36) |
|  | **Anxiety:** State-Trait Anxiety Inventory (STAI) |
|  | **Job Satisfaction:** Job Descriptive Index (JDI): supervision, co-workers, work, pay and promotion; Job in General (JIG) |
| **Notes** | n.a. |

Chin et al. (2019)

| **Pub title** | Chin, B., Slutsky, J., Raye, J., & Creswell, J. D. (2019). Mindfulness training reduces stress at work: A randomized controlled trial. *Mindfulness*, 10, 627-638. |
| --- | --- |
| **Aim of study** | “Here, we conducted a two-arm RCT at work among employees of a digital marketing firm comparing the efficacy of a high-dose 6 week mindfulness training to a low-dose single-day mindfulness training for improving multiple measures of employee well-being assessed using ecological momentary assessment.” |
| **Methods** | **Study Design:** RCT |
| **Participants** | **Population:** employees of a digital marketing firm |
| **Sample Size (randomized):** 60 |
| **Age in Years, M(SD):** 30,52 (7,8) |
| **Sex (% female):** 66,7% |
| **Country:** USA |
| **Type of company:** Digital marketing firm |
| **Programs** | **Number of Intervention Groups:** 1 |
| **Intervention Group No. 1:** High-Dosage Mindfulness Training (HDMT) |
| Setting: |
| Duration/Time: 6 week period |
| Kind of mindfulness: based on the Unified Mindfulness system (Young, 2016) |
| Delivery: online video series and homework |
| **Control Group No. 1:** Low-Dosage Mindfulness Training (LDMT) |
| Type of Control Group: active control |
| **Outcomes** | **Time points for assessment:** pre intervention, post intervention |
| **Perceived stress:** Perceived Stress Scale (PSS; Cohen & Williamson, 1988) |
| **Coping efficacy and success** |
| **Positive affect** |
| **Negative affect** |
| **Notes** | n.a. |

Christopher et al. (2018)

| **Pub title** | Christopher, M. S., Hunsinger, M., Goerling, Lt. R. J., Bowen, S., Rogers, B. S., Gross, C. R., Dapolonia, E., & Pruessner, J. C. (2018). Mindfulness-based resilience training to reduce health risk, stress reactivity, and aggression among law enforcement officers: A feasibility and preliminary efficacy trial. *Pschiatry Research*, *264*, 104-115. |
| --- | --- |
| **Aim of study** | “The primary objective of this study was to assess feasibility and gather preliminary outcome data on Mindfulness-Based Resilience Training (MBRT) for law enforcement officers.” |
| **Methods** | **Study Design:** RCT |
| **Participants** | **Population:** law enforcement officers |
| **Sample Size (randomized):** 61 |
| **Age in Years, M(SD):** 43,99 (6,04) |
| **Sex (% female):** 10% |
| **Country:** USA |
| **Type of company:** law enforcement agencies |
| **Programs** | **Number of Intervention Groups:** 1 |
| **Intervention Group No. 1:** Experimental Group |
| Setting: |
| Duration/Time: 8 weeks; 2h once per week + 6h class in week 7 |
| Kind of mindfulness: Based on a Mindfulness-Based Stress Reduction (Kabat-Zinn, 1990) framework |
| Delivery: in-class |
| **Control Group No. 1:** waitlist control group |
| Type of Control Group:waitlist control |
| **Outcomes** | **Time points for assessment:** pre, post (after 8 weeks), follow-up (after 12 weeks) |
| **Alcohol use, anxiety, depression, sleep difficulties:** PROMIS |
| **Suicidal ideation:** Concise Health Risk Tracking Scale (CHRT; Trivedi et al., 2011) |
| **Stress:** Police Stress Questionnaire (PSQ; McCreary & Thompson, 2006) |
| **Burnout:** Oldenbourg Burnout Inventory(OLBI; Demerouti et al., 2003; Halbesleben & Demerouti, 2005) |
| **Mindfulness:** Five Facet Mindfulness Questionnaire-Short Form (FFMQ-SF; Bohlmeijer et al., 2011) |
| **Risilience:** Connor-Davidson Resilience Scale (CD-RISC; Connor & Davidson, 2003) |
| **Psychological flexibility:** Acceptance and Action Questionnaire-II (AAQ-II; Bond et al., 2011) |
| **Self-Compassion:** Self-Compassion Scale-Short Form (SCS-SF; Raes et al., 2011) |
| **Anger, Aggression:** Buss-Perry Aggression Questionnaire-Short Form (BPAQ-SF; Bryant & Smith, 2001) |
| **Notes** | n.a. |

Crain et al. (2017)

| **Citation** | Crain, T. L., Schonert-Reichl, K. A., & Roeser, R. W. (2017). Cultivating teacher mindfulness: Effects of a randomized controlled trial on work, home, and sleep outcomes. *Journal of occupational health psychology*, *22*, 138-. |
| --- | --- |
| **Aim of study** | The current study utilizes a RCT design and examines whether or not randomization to a WMT for public school teachers who volunteer for the program is associated with outcomes in three domains: work, home, and sleep. (p.2) |
| **Methods** | **Study Design:** RCT |
| **Participants** | **Population:** teachers |
| **Sample Size (randomized):** N = 113 |
| **Age in Years, M(SD):** 46.9(9.2.) |
| **Sex (% female):** 89% |
| **Country:** USA/Canada |
| **Type of company:** school |
| **Programs** | **Number of Intervention Groups:** 1 |
| **Intervention Group No. 1:** Mindfulness Intervention group |
| Setting:at work |
| Duration/Time: 8 weeks; 1.38 h-session/week; encouraged to practice at home |
| Kind of mindfulness:Work Mindfulness Training based off of established MBSR techniques (approximately 60% of material) and was developed specifically for educators. |
| Delivery:in class |
| **Control Group No. 1:** waitlist control group |
| Type of Control Group: waitlist control group |
| **Outcomes** | **Time points for assessment:** pre-intervention; post-intervention (8 weeks from baseline); follow-up (3 months from post intervention) |
| **Mindfulness:** Five Factor Mindfulness Questionnaire (FFM; Baer et al., 2008) |
| **Job rumination at home:** two items taken from a broader inventory of teacher stress and coping items (Lambert, McCarthy, & Abbott-Shim, 2001)  **Satisfaction and mood:** Previous survey items were used as a basis for creating new, single item context specific indicators of satisfaction (Ho & Au, 2006) and mood (Kahneman, Krueger, Schkade, Schwarz, & Stone, 2004) |
| **Sleep quality, sleep quantity, and sleepiness:** Measures of sleep quantity and quality were drawn from Kahneman et al. (2004) |
|  |
| **Notes** | n.a. |

Dwivedi et al. (2015)

| **Pub title** | Dwivedi, U., Kumari, S., Akhilesh, K. B., & Nagendra, H. R. (2015). Well-being at workplace through mindfulness: Influence of Yoga practice on positive affect and aggression. *Ayu*, *36*, 375-379. |
| --- | --- |
| **Aim of study** | “The present study examined the effect of mindfulness developed through *Yoga* practices on aggression and PA among working professionals involved in CWB.” (p. 375) |
| **Methods** | **Study Design:** RCT |
| **Participants** | **Population:** Participants from a private enterprise in Engineering Department of information technology sector in Pune |
| **Sample Size (randomized):** 160 |
| **Age in Years, M(SD):** Yoga group: 28,29 (5,21); Control group: 27,20 (4,14) |
| **Sex (% female):** 45% (n=72) |
| **Country:** India |
| **Type of company:** a private enterprise in Engineering Department of information technology sector |
| **Programs** | **Number of Intervention Groups:** 1 |
| **Intervention Group No. 1:** Yoga group |
| Setting: Offered within the organization’s campus |
| Duration/Time: 10 weeks; 1 h daily, 5 days a week |
| Kind of mindfulness:   - Theory and postures (35 min; Yogic theory on Rajayoga, Bhaktiyoga, Karmayoga Jnanayoga, and Satvik diet. Asanas covered were Suryanamaskara (sun salutations), Trikonasana (triangle pose), Virabhadrasana (warrior pose), Parsvakonasana (sides angle pose), Vrikshasana (tree pose), Ardha Matsyendrasana (half twist pose), and Bhujangasana (cobra pose)) - Breathing (15 min): Bhastrika (bellows breathing), Kapalabhati (skull shining breathing), Anuloma‐Viloma (alternate nostril breathing), and Bhramari (bee breathing) - Meditation (10 min): Dhyana and Yoganidra. |
| Delivery: n. r. |
| **Control Group No. 1:** control Group |
| Type of Control Group:active control group |
| **Outcomes** | **Time points for assessment:** Baseline (pre intervention), 10 week (post intervention) |
| **Counterproductive workplace behavior:** Counterproductive Workplace Behavior Checklist (CWB‑C; Spector et al. 2004) |
| **Agression:** Aggression Questionnaire (Buss & Perry, 1992) |
| **Positive affectivity:** positive and negative affect schedule (PANAS-X; Watson et al. 1999) |
| **Notes** | n. a. |

Flaxman and Bond (2010)

| **Pub title** | Flaxman, P. E., & Bond, F. W. (2010). Worksite stress management training: Moderated effects and clinical significance. *Journal of Occupational Health Psychology, 15*(4), 347-358. |
| --- | --- |
| **Aim of study** | **“**This study aimed to provide a rigorous and detailed evaluation of the impact of a worksite SMT program and to address some of the conceptual and methodological issues that exist within the worksite SMT literature.**“** (p. 356) |
| **Methods** | **Study Design:** RCT |
| **Participants** | **Population:** employees from various departments within two organizations, including council tax, environmental health, housing and social services (welfare), education, finance, and libraries |
| **Sample Size (randomized):** 311 |
| **Age in Years, M(SD):** 41(n.r.), 18-63 |
| **Sex (% female):** n.r. |
| **Country:** U.K. |
| **Type of company:** local government organizations in London |
| **Programs** | **Number of Intervention Groups:** 1 |
| **Intervention Group No. 1:** SMT group |
| Setting: during working hours |
| Duration/Time: 6 months, 3 sessions, 2,5-3 hours each (2 in consecutive weeks, 1 three months later) |
| Kind of mindfulness: SMT program adopted the principles and tech-  niques of ACT; a mindfulness-based CBT, emphasizing the intimate link between mindfulness and values-based action skills (Flaxman & Bond, 2006; eyes-closed mindfulness (meditative) exercises, cognitive defusion exercises, values and goals clarification Exercises) |
| Delivery: in-class |
| **Control Group No. 1:** waiting list control group |
| Type of Control Group: waitlist control |
| **Outcomes** | **Time points for assessment:** baseline (Time 1), three months after two initial training sessions (Time 2), and another three months after a final training session (Time 3) |
| **General psychological distress:** general health questionnaire (GHQ-12; Goldberg & Williams, 1988) |
| **Notes** | n.a. |

Flook et al. (2013)

| **Pub title** | Flook, L., Goldberg, S. B., Pinger, L., Bonus, K., & Davidson, R. J. (2013). Mindfulness for teachers: A pilot study to assess effects on stress, burnout, and teaching efficacy. *Mind, Brain, and Education*, *7*, 182-195. |
| --- | --- |
| **Aim of study** | to adapt MBSR for teachers and to conduct a preliminary evaluation by assessing outcomes across variety of self-report and objective measures that may be impacted by mindfulness training, including observation of classroom teaching practices, computerized tasks related to attention and emotion regulation, and *saliva* sampling for cortisol as a physiological stress index. In addition, we sought to examine associations between change in mindfulness and change in other outcomes. |
| **Methods** | **Study Design:** RCT, pilot trial |
| **Participants** | **Population:** public elementary school teachers |
| **Sample Size (randomized):** 18 |
| **Age in Years, M(SD):** 43.06 (9.87), 25-56 |
| **Sex (% female):** 16/18 (88,89%) |
| **Country:** U.S. |
| **Type of company:** school |
| **Programs** | **Number of Intervention Groups:** 1 |
| **Intervention Group No. 1: i**ntervention group |
| Setting: n.r. |
| Duration/Time: eight weeks, 2.5 hours/week, plus a day-long immersion (6 hours), totalling approximately 26 hours of group practice and instruction |
| Kind of mindfulness: standard MBSR curriculum was adapted for teachers to focus on integrating skills into the classroom |
| Delivery: in class & outside of class with guided recordings |
| **Control Group No. 1:** control group |
| Type of Control Group: waitlist control group |
| **Outcomes** | **Time points for assessment:** Pre-test (during 4 weeks), post-test (after 8 week intervention during 3 weeks) |
| **Psychological Distress:** GSI; Symptom Checklist 90-R (SCL-90-R; Derogatis, 1994) |
| **Mindfulness:** Five-Facet Mindfulness Scale (FFMQ; Baer, Smith, Hopkins, Krietemeyer, & Toney, 2006) |
| **Self-Compassion:** Self-Compassion Scale (SCS) |
| **Burnout:** The Maslach Burnout Inventory – Educators Survey (MBI-ES) |
| **Teacher Classroom Behavior:** The Classroom Assessment Scoring System (CLASS); observational coding system |
|  | **Cortisol Measurement:** Saliva samples were collected to measure cortisol (nmol/L) |
|  | **Neuropsychological and attentional tasks:** The Cambridge Neuropsychological Test Automated Battery (CANTAB); The Rapid Visual Information Processing task (RVP) & The Affective Go/No-Go task (AGN) |
|  | **Mindfulness Practice Compliance:** Participants in the mindfulness training group completed practice logs on a weekly basis. |
| **Notes** | n.a. |

Grégoire and Lachance (2015)

| **Pub title** | Grégoire, S., & Lachance, L. (2015). Evaluation of a brief mindfulness-based intervention to reduce psychological distress in the workplace. *Mindfulness*, *6*, 836-847. |
| --- | --- |
| **Aim of study** | “[…] its aim was to develop a brief and flexible MBI for call center employees and assess its effect on mindfulness, psychological distress, and client satisfaction.” |
| **Methods** | **Study Design:** RCT, switching-replication |
| **Participants** | **Population:** employees of a call center working for a financial institution |
| **Sample Size:** 49 |
| **Age in Years, M(SD):** 35.8, 26-57 |
| **Sex (% female):** 91% |
| **Country:** Canada |
| **Type of company:** call center of a financial institution |
| **Programs** | **Number of Intervention Groups:** *2* |
| **Intervention Group No. 1:** Group 1 (first EG then CG)  **Intervention Group No. 2:** Group 2 (first CG then EG) |
| Setting: at workplace |
| Duration/Time: 5 weeks |
| Kind of mindfulness: brief body scans and sitting meditation sessions covered five different themes, one for each week (attention to physical sensations, attention to the breath, attention to sounds and silence, attention to emotions, and awakening confidence), and they were based on the following processes: attention and awareness, acceptance and openness, decentering, letting go, focusing on the present moment, and the practice of being fully aware during every-day activities. |
| Delivery: at workplace, 15min daily audio sessions |
| **Control Group No. 1:** Control Group (Group 1 & 2 switched roles) |
| Type of Control Group:control |
| **Outcomes** | **Time points for assessment:** t1 (week 1), t2 (week 6), t3 (week 11) |
| **Mindfulness:** Mindfulness Attention Awareness Scale (MAAS) |
| **Stress:** Psychological Stress Measure (PSM-9) |
| **Anxiety and Depression:** five-item subscale of the same name of the Psychological Distress Manifestation Scale (PDMS) |
| **Level of fatigue:** Fatigue Scale |
| **Negative affect:** subscale of the same name of the Positive and Negative Affect Schedule (PANAS) |
| **Notes** | n.a. |

Harris et al. (2016)

| **Pub title** | Harris, A. R., Jennings, P. A., Katz, D. A., Abenavoli, R. M., & Greenberg, M. T. (2016). Promoting stress management and wellbeing in educators: Feasibility and efficacy of a school-based yoga and mindfulness intervention. *Mindfulness, 7*, 143-154. |
| --- | --- |
| **Aim of study** | **“**In the current study, we investigate the feasibility and efficacy of a new yoga-based CI, CALM (Community Approach to Learning Mindfully), as a support for educator wellbeing. CALM is based in gentle yoga and mindfulness practice and is hypothesized to improve emotional functioning and stress management as well as teaching, health, and wellbeing (see Fig. 1). The innovative, school-based, daily, morning format of CALM was designed to increase accessibility and promote skill transfer.“ (p. 144) |
| **Methods** | **Study Design:** RCT |
| **Participants** | **Population:** teachers |
| **Sample Size (randomized):** 64 |
| **Age in Years, M(SD):** 43 (12,53), 21-69 |
| **Sex (% female):** 88% |
| **Country:** USA |
| **Type of company:** two middle schools |
| **Programs** | **Number of Intervention Groups:** 1 |
| **Intervention Group No. 1:** intervention group |
| Setting: inclass, before school |
| Duration/Time: 16 weeks, 4x20min sessions weekly (asked to visit at least two per week and to practice individually) |
| Kind of mindfulness: CALM is based in gentle yoga and mindfulness practices (Harris and Hudecek, 2013) |
| Delivery: inclass |
| **Control Group No. 1:** control group |
| Type of Control Group: waitlist control |
| **Outcomes** | **Time points for assessment:** Pre (in the Fall of year 1), post (in the Spring of year 1) |
| **Mindfulness:** Five Facet Mindfulness Questionnaire (FFMQ; Baer, Smith, Hopkins, Krietemeyer, & Toney, 2006) |
| **Affect:** Positive and Negative Affect Schedule—Short Form (PANAS; Thompson, 2007; Watson, Clark, & Tellegen, 1988) |
| **Emotion Regulation:** Emotion Regulation Questionnaire (ERQ; Gross and  John, 2003) |
| **Distress Tolerance:** Distress Tolerance Scale (DTS; Simons, & Gaher, 2005) |
| **Relational Trust:** Teacher-Teacher Relational Trust (Bryk, & Schneider, 2002) |
| **Teaching Efficacy:** subset of items from the Teachers’ Sense of Efficacy Scale (TSES; Tschannen-Moran, & Hoy, 2001) |
| **Time Urgency:** nine items assessed feelings of task-related time pressure and general hurry (Landy et al. 1991) |
| **Perceived Stress:** four items from the Perceived Stress Scale (Cohen, Kamarck, & Mermelstein, 1983) |
| **Professional Burnout:** Maslach Burnout Inventory—Educators Survey (MBI; Maslach, & Jackson, 1981) |
| **Physical symptoms:** Daily Physical Symptoms scale (Larsen, & Kasimatis, 1991) |
| **Sleep-related impairment:** PROMIS Sleep-Related Impairment scale (Buysse, Yu, Moul, Germain, Stover, Dodds, et al., 2010) |
| **Blood pressure** |
| **Cortisol** |
| **Notes** | n.a. |

Huang et al. (2015)

| **Pub title** | Huang, S. L., Li, R. H., Huang, F. Y., & Tang, F. C. (2015). The potential for mindfulness-based intervention in workplace mental health promotion: Results of a randomized controlled trial. *PloS one, 10*, e0138089. |
| --- | --- |
| **Aim of study** | **“**This study aims to intensively evaluate the effectiveness of mindfulness-based intervention (MBI) on mental illness risks (including psychological distress, prolonged fatigue, and perceived stress) and job strain (job control and job demands) for employees with poor mental health.“ (p.1) |
| **Methods** | **Study Design:** RCT |
| **Participants** | **Population:** industrial full-time employees |
| **Sample Size (randomized):** 144 |
| **Age in Years, M(SD):** intervention group: 42,4 (n.r.), control group 42,7 (n.r.) |
| **Sex (% female):** Intervention group: 50%, control group: 31,9% |
| **Country:** Taiwan |
| **Type of company:** Two large-scale manufacturing factories |
| **Programs** | **Number of Intervention Groups:** 1 |
| **Intervention Group No. 1:** intervention group |
| Setting: during paid working hours at the workplace (in factory) |
| Duration/Time: 8 weeks, 2 hours training weekly, 45min homework practice daily |
| Kind of mindfulness: MBI program based on the Mindfulness-Based Stress Reduction (MBSR) curriculum structure developed in the Stress Reduction Clinic of the University of Massachusetts Medical School, but without an all-day class (Kabat-Zinn, 1990) |
| Delivery: in-class, homework |
| **Control Group No. 1:** waitlist control group |
| Type of Control Group: waitlist control |
| **Outcomes** | **Time points for assessment:** T1 (pre-intervention); T2 (mid-intervention); T3 (post intervention); T4 (four weeks after intervention); T5 (eight weeks after intervention) |
| **Psychological Distress:** Chinese Health Questionnaire (CHQ-12; Cheng & Williams, 1986) |
| **Fatigue:** Checklist Individual Strength questionnaire (CIS; Lewis, & Wessely, 1992) |
| **Perceived Stress:** Perceived Stress Scale (PSS-10; Chinese Version by Wang, Cheng, Boyd, Zhang, Jia, & Qiu, 2011)) |
| **Job Strain:** subscales job control and job demands of the Job Content Questionnaire (JCQ; Chinese Version by Cheng, Luh, & Guo, 2003) |
| **Notes** | n.a. |

Ireland et al. (2017)

| **Citation** | Ireland, M. J., Clough, B., Gill, K., Langan, F., O'Connor, A., & Spencer, L. (2017). A randomized controlled trial of mindfulness to reduce stress and burnout among intern medical practitioners. *Medical teacher*, 39, 409-414. |
| --- | --- |
| **Aim of study** | The aim of the current study was to examine the efficacy of a mindfulness-based intervention to reduce stress and burnout among intern doctors working in a large hospital emergency department. (p.410) |
| **Methods** | **Study Design:** RCT |
| **Participants** | **Population:** intern doctors |
| **Sample Size (randomized):** N = 44 |
| **Age in Years, M(SD):** 26.88(4.79.) |
| **Sex (% female):** 64% |
| **Country:** Australia |
| **Type of company:** major metropolitan hospital |
| **Programs** | **Number of Intervention Groups:** 1 |
| **Intervention Group No. 1:** Mindfulness Intervention group |
| Setting:at work |
| Duration/Time: 10 weeks; 1h-session/week; encouraged to practice at home |
| Kind of mindfulness:mix mindfulness education and Practice; Mindfulness-Based Stress Reduction, Mindfulness-Based Cognitive Therapy, and Acceptance and Commitment Therapy |
| Delivery:in class |
| **Control Group No. 1:** active control group |
| Type of Control Group: active control group |
| **Outcomes** | **Time points for assessment:** pre-intervention; mid-intervention (5 weeks from baseline); post-intervention (10 weeks from baseline) |
| **Burnout:** Copenhagen Burnout Inventory (CBI; Kristensen et al. 2005) |
| **Perceived Stress:** Perceived Stress Scale (PSS; Cohen et al. 1983) |
| **Notes** | n.a. |

Jennings et al. (2013)

| **Pub title** | Jennings, P. A., Frank, J. L., Snowberg, K. E., Coccia, M. A., & Greenberg, M. T. (2013). Improving classroom learning environments by Cultivating Awareness and Resilience in Education (CARE): Results of a randomized controlled trial. *School Psychology Quarterly, 28*, 374-390. |
| --- | --- |
| **Aim of study** | **“**Here we test the effectiveness of the Cultivating Awareness and Resilience in Education (CARE) model of professional development on teacher’s well-being, classroom efficacy, burnout, stress, and health.” |
| **Methods** | **Study Design:** RCT |
| **Participants** | **Population:** teacher |
| **Sample Size (randomized):** 53 |
| **Age in Years, M(SD):** 36 (n.r.) 22-60 |
| **Sex (% female):** 89% |
| **Country:** U.S. |
| **Type of company:** public schools |
| **Programs** | **Number of Intervention Groups:** 1 |
| **Intervention Group No. 1:** Intervention group |
| Setting: n. r. |
| Duration/Time: 30-hr program presented in four day-long sessions over 4–6 weeks (2-day weekend session (12 hours), a 1-day session 2 and 4 weeks after the initial sessions, a 1-day booster session one month later) |
| Kind of mindfulness: CARE (Bash, 2005) combines emotion skills instruction, mindful awareness practices, and compassion building activities |
| Delivery: in-class |
| **Control Group No. 1:** waitlist control group |
| Type of Control Group: waitlist control |
| **Outcomes** | **Time points for assessment:** Pretest; Posttest |
| **Affect:** Positive and Negative Affect Schedule (PANAS; Watson, Clark, & Tellegen, 1988) |
| **Depression:** The Center for Epidemiologic Studies Depression Scale (CES-D-20; Radloff, 1977) |
| **Physical Symptoms:** The Daily Physical Symptoms (DPS; Larsen & Kasimatis, 1997) |
| **Emotion Regulation:** Emotion Regulation Questionnaire (Gross, 2002) |
| **Efficacy:** Teachers’ Sense of Efficacy Questionnaire (TSES; Tschannen-Moran & Woolfolk Hoy, 2001) |
| **Burnout:** Maslach Burnout Inventory (Educators’ Survey) (MBI; Maslach, Jackson, & Leiter, 1997) |
| **Time Pressure:** The Time Urgency Scale (TUS; Landy, Rastegary Thayer, & Colvin, 1991) |
| **Mindfulness:** The Five Facet Mindfulness Questionnaire (FFMQ; Baer, Smith, Hopkins, Krietemeyer, & Toney, 2006) |
| **Program evaluation:** The *CARE Acceptability Questionnaire* (CAQ) |
| **Notes** | n.a. |

Klatt et al. (2009)

| **Pub title** | Klatt, M. D., Buckworth, J., & Malarkey, W. B. (2009). Effects of low-dose mindfulness-based stress reduction (MBSR-ld) on working adults. *Health Education & Behavior, 36*, 601-614. |
| --- | --- |
| **Aim of study** | “[…] the purpose of this study was to determine whether the MBSR-ld program would produce a statistically significant decrease in symptoms of stress and yield adherence rates that mimicked those of traditional MBSR interventions (85%).” (p. 603) |
| **Methods** | **Study Design:** RCT |
| **Participants** | **Population:** university staff |
| **Sample Size (randomized):** N = 42 |
| **Age in Years, M(SD):** 45(2.03); 18-60 |
| **Sex (% female):** 75 |
| **Country:** USA |
| **Type of company:** Midwestern University |
| **Programs** | **Number of Intervention Groups:** 1 |
| **Intervention Group No. 1:** Mindfulness Intervention group |
| Setting:on campus |
| Duration/Time: 6 weeks; 1x 1h-session/week |
| Kind of mindfulness: MBSR-short (breathing, relaxation, body scans, gentle yoga movement) |
| Delivery:training applied inclass |
| **Control Group No. 1:** control group |
| Type of Control Group: waitlist control group |
| **Outcomes** | **Time points for assessment:** pre-intervention; post-intervention |
| **Stress:** Perceived Stress Scale (Cohen, Kamarck, & Mermelstein, 1983) |
| **Sleep Quality:** Pittsburgh Sleep Quality Index (Buysse, Reynolds, Monk, Berman, & Kupfer, 1989): Participant Sleep Quality, Sleep Latency, Sleep Duration, Habitual Sleep Efficiency, Sleep Disturbances, Use of Sleep Medications, and Daytime Dysfunction |
| **Mindfulness:** Mindful Attention Awareness Scale (MAAS; Brown & Ryan, 2003) -cognitive, emotional, physical, interpersonal, and general domains |
| **Salivary Cortisol:** collected using a Salivette |
| **Notes** | n.a. |

Klatt et al. (2017)

| **Pub title** | Klatt, M., Norre, C., Reader, B., Yodice, L., & White, S. (2017). Mindfulness in motion: A mindfulness-based intervention to reduce stress and enhance quality of sleep in scandinavian employees. *Mindfulness.* doi 10.1007/s12671-016-0621-x. |
| --- | --- |
| **Aim of study** | “This study examined the effectiveness of the Danish translation of MIM and investigated the ability of MIM to reduce stress while enhancing quality of sleep and work engagement in bank employees of a non-American culture” |
| **Methods** | **Study Design:** RCT |
| **Participants** | **Population:** bank employees |
| **Sample Size (randomized):** N = 57 |
| **Age in Years, M(SD):** 42.9(9.3); 18-60 |
| **Sex (% female):** 69 |
| **Country:** Copenhagen,Denmark |
| **Type of company:** bank |
| **Programs** | **Number of Intervention Groups:** 1 |
| **Intervention Group No. 1:** Mindfulness Intervention group |
| Setting:worksite |
| Duration/Time: 8 weeks; 1x 1h-session/week |
| Kind of mindfulness: Mindfulness in Motion (MIM), includes reflective writing, community sharing among participants, mindfulness instruction and meditation, yoga, and relaxing music. |
| Delivery:training applied inclass |
| **Control Group No. 1:** control group |
| Type of Control Group: waitlist control group |
| **Outcomes** | **Time points for assessment:** pre-intervention; week 8: post-intervention; follow up 9 weeks after intervention (intervention group only) |
| **Stress:** Perceived Stress Scale (Cohen, Kamarck, & Mermelstein, 1983) |
| **Sleep Quality:** Pittsburgh Sleep Quality Index (Buysse, Reynolds, Monk, Berman, & Kupfer, 1989): Participant Sleep Quality, Sleep Latency, Sleep Duration, Habitual Sleep Efficiency, Sleep Disturbances, Use of Sleep Medications, and Daytime Dysfunction |
| **Work Engagement:** Utrecht Work Engagement Scale-9 (UWES-9; Schaufeli et al. 2006)- positive attitude towards job, increase or decrease of positive work elements |
| **Notes** | n.a. |

Lacerda et al. (2018)

| **Pub title** | Lacerda, S. S., Little, S. W., & Kozasa, E. H. (2018). A stress reduction program adapted for the work environment: A randomized controlled trial with a follow-up*. Frontiers in Psychology, 9*, 668. |
| --- | --- |
| **Aim of study** | “[…] to evaluate an in situ stress reduction program, named PROGRESS, developed to meet the specific needs of workers in a business context and to research its impact upon non-severe psychiatric symptoms, stress, anxiety, depression, processing speed/attention and mindfulness.” |
| **Methods** | **Study Design:** RCT |
| **Participants** | **Population:** n.r. |
| **Sample Size (randomized):** 44 |
| **Age in Years, M(SD):** 36,6 (9,85) |
| **Sex (% female):** 54,5 |
| **Country:** Brazil |
| **Type of company:** n.r. |
| **Programs** | **Number of Intervention Groups:** 1 |
| **Intervention Group No. 1:** Progress-Group |
| Setting: n.r. |
| Duration/Time: 1 hour/week, 8 weeks |
| Kind of mindfulness: |
| Delivery: in-class |
| **Control Group No. 1:** control group |
| Type of Control Group: waitlist control |
| **Outcomes** | **Time points for assessment:** pre-intervention, post-intervention; 8-week follow-up |
| **Mindfulness:** Mindful Attention Awareness Scale (MAAS; Brown & Ryan, 2003) |
| **Psychiatric Symptoms:** Self-Report Questionnaire-20 (SRQ-20; Mari & Williams, 1985) |
| **Stress:** Lipp Stress Symptoms Inventory (ISSL; Lipp, 2000) |
| **Depression:** Beck Depression Inventory (BDI; Beck et al., 1961) |
| **Anxiety:** Beck Anxiety Inventory (BAI; Beck, Epstein, Brown & Steer, 1988) |
| **Processing Speed:** Digit-Symbol (DS WAIS- III; Wechsler, 2004) |
| **Notes** | n.a. |

Lin et al. (2019)

| **Citation** | Lin, L., He, G., Yan, J., Gu, C., & Xie, J. (2019). The Effects of a Modified Mindfulness-Based Stress Reduction Program for Nurses: A Randomized Controlled Trial. *Workplace Health & Safety*, 67, 111-122. |
| --- | --- |
| **Aim of study** | The purpose of the study was to evaluate the effects of a modified mindfulness-based stress reduction (MBSR) program on the levels of stress, affect, and resilience among nurses in general hospitals in mainland China. |
| **Methods** | **Study Design:** RCT |
| **Participants** | **Population:** nurses |
| **Sample Size (randomized):** N = 110 |
| **Age in Years, M(SD):** 31.5(6.9) |
| **Sex (% female):** 93% |
| **Country:** China |
| **Type of company:** hospital |
| **Programs** | **Number of Intervention Groups:** 1 |
| **Intervention Group No. 1:** Mindfulness Intervention group |
| Setting:at work |
| Duration/Time: 8 weeks; 2h-session/week; 20 minutes of formal mindfulness practice at home daily for 6 days a week for 8 weeks |
| Kind of mindfulness:mindfulness-based group intervention generally based on the principles and exercises of MBSR (Kabat-Zinn, 1990) and MBCT (Teasdale et al., 2000). |
| Delivery:in class |
| **Control Group No. 1:** waitlist control group |
| Type of Control Group: waitlist control group |
| **Outcomes** | **Time points for assessment:** pre-intervention; post-intervention (8 weeks from baseline); follow-up (3 months from baseline) |
| **Perceived Stress:** Perceived Stress Scale (PSS; Cohen, Kamarck, & Mermelstein, 1983; Chinese Version: Yang & Huang, 2003)  **Positive and Negative Affect:** Positive and Negative Affect Schedule (PANAS; Watson, Clark, & Tellegen, 1988; Chinese Version: Huang, Yang, & Li, 2003)  **Resilience:** Connor–Davidson Resilience Scale (CD-RISC; Connor & Davidson, 2003; Chinese Version: Yu & Zhang, 2007) |
| **Job Satisfaction**: The McCloskey/Mueller Satisfaction Scale (MMSS; Mueller & McCloskey, 1990; Chinese Version: He, Zhang, & Bai, 2008) |
| **Notes** | n.a. |

Mackenzie et al. 2006

| **Pub title** | Mackenzie, C. S., Poulin, P. A., & Seidman-Carlson, R. (2006). A brief mindfulness-based stress reduction intervention for nurses and nurse aides. *Applied nursing research, 19*, 105-109. |
| --- | --- |
| **Aim of study** | “The purposes of this study were to address the relative dearth of research on mindfulness training with nonclinical populations in general and practicing nurses and nurse aides specifically, and to describe and evaluate the efficacy of a brief version of the traditional MBSR program.” |
| **Methods** | **Study Design:** RCT |
| **Participants** | **Population:** nurses |
| **Sample Size (randomized):** N = 30 |
| **Age in Years, M(SD):** 46.7(7.34); n.r. |
| **Sex (% female):** 96.7 |
| **Country:** Canada |
| **Type of company:** hospital |
| **Programs** | **Number of Intervention Groups:** 1 |
| **Intervention Group No. 1:** Mindfulness Intervention group |
| Setting: at work |
| Duration/Time: 4 weeks; 1x 0.5h-session/week |
| Kind of mindfulness: “a shortened version of the traditional MBSR program that synthesizes its main elements, is congruent with its underpinning philosophy, and is easier to incorporate into nurses’ work schedules” |
| Delivery:training applied inclass |
| **Control Group No. 1:** waitlist-control group |
| Type of Control Group: waitlist control group |
| **Outcomes** | **Time points for assessment:** pre-intervention; post-intervention |
| **Burnout:** Maslach Burnout Inventory (Maslach, Jackson, & Leiter,  1996)  **Relaxation:** Smith Relaxation Dispositions Inventory (SRDI; Smith,  2001) |
| **Job Satisfaction:** Intrinsic Job Satisfaction subscale from the Job Satisfaction Scale (JSS; Koeske, Kirk, Koeske, & Rauktis, 1994)  **Life Satisfaction:** Satisfaction With Life Scale (Diener, Emmons, Larsen,  & Griffin, 1985)  **Sense of Coherence:** Orientation to Life Questionnaire (OLQ; Antonovsky, 1987) |
| **Notes** | n.a. |

Manotas et al. (2014)

| **Pub title** | Manotas, M., Segura, C., Eraso, M., Oggins, J., & McGovern, K. (2014). Association of brief mindfulness training with reductions in perceived stress and distress in Colombian health care professionals. *International Journal of Stress Management, 21*, 207-225. |
| --- | --- |
| **Aim of study** | **“**This randomized, controlled study was designed to (a) replicate the benefits of mindfulness-based interventions in a community sample of health care employees at La Fundación Santa Fe de Bogota in Bogota, Colombia, a new population and geographic area; and (b) examine the efficacy of a 4-week mindfulness intervention.“ |
| **Methods** | **Study Design:** RCT |
| **Participants** | **Population:** health care providers |
| **Sample Size (randomized):** 131 |
| **Age in Years, M(SD):** 39,05 (8,11), 25-59 |
| **Sex (% female):** 90,2 |
| **Country:** Colombia |
| **Type of company:** La Fundación Santa Fe de Bogota (FSFB) |
| **Programs** | **Number of Intervention Groups:** 1 |
| **Intervention Group No. 1:** experimental group |
| Setting: at the hospital but could not be scheduled during work time |
| Duration/Time: 4 weeks, one 2hr weekly session |
| Kind of mindfulness: “adaptation of MBSR that taught the main elements of an MBSR course” |
| Delivery: in-class, homework |
| **Control Group No. 1:** control group |
| Type of Control Group: waitlist control |
| **Outcomes** | **Time points for assessment:** Pre- and post-intervention |
| **Psychological distress:** Spanish version of Brief Symptom Inventory-18 (BSI-18; Derogatis, 2001) |
| **Stress:** Spanish version of Perceived Stress Scale (PSS; Cohen, Kamarck, & Mermelstein, 1983) |
| **Mindfulness:** Spanish version of FFMQ; Baer, Smith, Hopkins, Krietemeyer, & Toney, 2006) |
| **Notes** | n.a. |

McConachie et al. (2014)

| **Pub title** | McConachie, D. A. J., McKenzie, K., Morris, P. G., & Walley, R. M. (2014). Acceptance and mindfulness-based stress management for support staff caring for individuals with intellectual disabilities. *Research in Developmental Disabilities, 35*, 1216-1227. |
| --- | --- |
| **Aim of study** | **“**This study examines the effectiveness of an acceptance and mindfulness-based stress management workshop on the levels of psychological distress and well-being of support staff working with individuals with ID and challenging behaviour.“ |
| **Methods** | **Study Design:** RCT |
| **Participants** | **Population:** support staff |
| **Sample Size (randomized):** 156 |
| **Age in Years, M(SD):** n.r. (n.r.), 19-69 |
| **Sex (% female):** 74,2 |
| **Country:** Scotland |
| **Type of company:** Independent care organizations working with individuals with intellectual disability (ID) |
| **Programs** | **Number of Intervention Groups:** 1 |
| **Intervention Group No. 1:** intervention group |
| Setting: n.r. |
| Duration/Time: full day workshop, followed by a half day refresher  session after six weeks |
| Kind of mindfulness: ACT (detailed protocol: Bon, & Hayes, 2002) |
| Delivery: in-class, homework |
| **Control Group No. 1:** control group |
| Type of Control Group: waitlist control |
| **Outcomes** | **Time points for assessment:** Pre/time 1, after six weeks at the refresher session (post/time 2), follow-up after a further six weeks (time 3) |
| **Psychological distress:** General Health Questionnaire-12 (GHQ-12; Goldberg, 1992) |
| **Psychological well-being:** Warwick-Edinburgh Mental Well-Being Scale (WEMWBS: Tennant et al., 2007) |
| **Staff perception of work stressors:** Staff Stressor Questionnaire (SSQ: Hatton et al., 1999) |
| **Experiential avoidance/psychological inflexibility:** Acceptance and Action Questionnaire-II (AAQ-II: Bond et al., 2011) |
| **Thought suppression:** White Bear Suppression Inventory (WBSI: Wegner & Zanakos, 1994) |
| **Notes** | n.a. |

Mistretta et al. (2018)

| **Pub title** | Mistretta, E. G., Davis, M. C., Temkit, M. H., Lorenz, C., Darby, B., & Stonnington, C. M. (2018). Resilience training for work-related stress among health care workers: results of a randomized clinical trial comparing in-person and smartphone-delivered interventions. Journal of occupational and environmental medicine, 60, 559-568. |
| --- | --- |
| **Aim of study** | The aim of this study was to assess whether an in-person mindfulness-based resilience training (MBRT) program or a smartphone-delivered resiliency-based intervention improved stress, well-being, and burnout in employees at a major tertiary health care institution. (p.559) |
| **Methods** | **Study Design:** RCT |
| **Participants** | **Population:** health care |
| **Sample Size (randomized):** 37 |
| **Age in Years, M(SD):** 47.35 (11,07) |
| **Sex (% female):** 91,9% |
| **Country:** USA |
| **Type of company:** major tertiary health care institution (the Mayo Clinic) |
| **Programs** | **Number of Intervention Groups:** 1 |
| **Intervention Group No. 1:** Mindfulness-based resilience training (MBRT) with aspects of MBSR and ACT |
| Setting: at work |
| Duration/Time: 6 weeks |
| Kind of mindfulness: Mindfulness-based resilience training incorporates two practices: learning mindfulness skills to deal effectively with unpleasant/ unwanted thoughts or experiences; and learning resilience skills to foster positive growth and behavior in keeping with one’s intentions and values. |
| Delivery: at work, audio |
| **Control Group No. 1:** active control group |
| Type of Control Group: active control, diary and sleep monitoring |
| **Outcomes** | **Time points for assessment:** baseline, post intervention (6 weeks from baseline), follow-up (3 months) |
| **Depression, Anxiety and Stress:** Depression, Anxiety, and Stress Scales (DASS-21) |
| **Well-being:** WHO (Five) Well-Being Index (WHO-5) |
| **Work-related burnout:** MBI-Human Services Survey (MBI-HSS) |
| **Compassion:** Self-Compassion Scale (SCS); Compassion for Others Scale |
| **Notes** | n.a. |

Michel, 2014

| **Pub title** | Mindfulness as a cognitive–emotional segmentation strategy: Anintervention promoting work–life balance |
| --- | --- |
| **Aim of study** | **“**In this study, the authors design and evaluate an intervention teaching mindfulness as a cognitive–emotional segmentation strategy to promote work–life balance.” |
| **Methods** | **Study Design:** RCT |
| **Participants** | **Population:** participants in various occupations |
| **Sample Size (randomized):** 412 |
| **Age in Years, M(SD):** 41.41 (9.40) |
| **Sex (% female):** 71.1% |
| **Country:** Germany |
| **Type of company:** n.r.; diverse |
| **Programs** | **Number of Intervention Groups:** 2 |
| **Intervention Group No. 1:** experimental group |
| Setting: n.r., probably at home |
| Duration/Time: 3 weeks; PART A = basic information and practical exercises of approximately 20 min for the weekend, PART B = daily task of approximately 3–5 min for the following five working days (information and instructions online in a written, downloadable format; audio files for the mindfulness exercises were available on the project homepage; reminders per SMS or e-mail were offered) |
| % Mindfulness: 100% |
| Kind of mindfulness: mindfulness intervention consisted of exercises related to mindfulness-based cognitive therapy (MBCT, Segal et al., 2002) and mindfulness-based stress reduction (MBSR, Kabat-Zinn, 1982, 2006) (Module 1: Reflecting segmentation, Module 2: Mindfulness and being in the present moment, Module 3: Mindfulness and coping with undesired thoughts and feelings) |
| Delivery: Online instructions, audio files |
| **Control Group No. 1:** control group |
| Type of Control Group: passive control |
| **Outcomes** | **Time points for assessment:** pre, post, 2-week follow-up |
| **Mindfulness:** seven items of the Cognitive and Affective Mindfulness Scale-Revised (CAMS-R; Feldman, Hayes, Kumar, Greeson, & Laurenceau, 2007) |
| **Psychological detachment from work during time off:** respective 4-item subscale of the Recovery Experience Questionnaire (Sonnentag & Fritz, 2007) |
| **Strain-based work-family conflict off:** 3-item subscale for strain-based WFC from the WFC Scale (Carlson, Kacmar, & Williams, 2000) adapted to focus on private life rather than family life |
| **Satisfaction with work-life balance:** four items from the Satisfaction with Work–Family Balance Scale (Valcour, 2007) |
| **Notes** | n.a. |

Molek-Winiarska & Żołnierczyk-Zreda (2018)

| **Pub title** | Molek-Winiarska, D., & Żołnierczyk-Zreda, D. (2018). Application of mindfulness-based stress reduction to a stress management intervention in a study of a mining sector company. *International Journal of Occupational Safety and Ergonomics*, 1-11. |
| --- | --- |
| **Aim of study** | The aim of this article was to check whether mindfulness-based stress reduction (MBSR) is an effective intervention in reducing work-related stress in the case of workers in a Coppermine (p.546) |
| **Methods** | **Study Design:** RCT |
| **Participants** | **Population:** copper mine workers |
| **Sample Size (randomized):** 66 |
| **Age in Years, M(SD):** 40.41 (7.08) |
| **Sex (% female):** 0% |
| **Country:** Poland |
| **Type of company:** industrial |
| **Programs** | **Number of Intervention Groups:** 1 |
| **Intervention Group No. 1:** Intervention |
| Setting: at work |
| Duration/Time: four 8-h group sessions, one 8-h group session (Mindfulness Day) over a period of 10 weeks |
| Kind of mindfulness: The stress management intervention – MBSR  training |
| Delivery: inclass |
| **Control Group No. 1:** waitlist control group |
| Type of Control Group: waitlist control |
| **Outcomes** | **Time points for assessment:** pretest, posttest |
| **Work-related stress:** Karasek’s job content questionnaire (JCQ; Polish version) |
| **Mental health:** 28-item general health questionnaire (GHQ-28) |
| **Notes** | n.a. |

Querstret, 2017

| **Pub title** | Querstret, D., Cropley, M., & Fife-Schaw, C. (2017). Internet-based instructor-led mindfulness for work-related rumination, fatigue, and sleep: Assessing facets of mindfulness as mechanisms of change A randomized waitlist control trial. *Journal of Occupational Health Psychology*, 22, 153-169. |
| --- | --- |
| **Aim of study** | **“**This study aimed to extend our theoretical understanding of how mindfulness-based interventions exert their positive influence on measures of occupational health. Employing a randomised waitlist control study design, we sought to: (1) assess an Internet-based instructor-led mindfulness intervention for its effect on key factors associated with ‘recovery from work’, specifically, work-related rumination, fatigue and sleep quality; (2) assess different facets of mindfulness (acting with awareness, describing, non-judging, and non-reacting) as mechanisms of change; and (3) assess whether the effect of the intervention was maintained over time by following up our participants after three and six months.“ |
| **Methods** | **Study Design:** RCT |
| **Participants** | **Population:** nursing/medicine (26.3%), healthcare (e.g., dieticians, physiotherapists; 20.3%), administration (19.5%), education (14.4%), management (8.5%), police (6.8%), and other (4.2%) |
| **Sample Size (randomized):** 118 |
| **Age in Years, M(SD):** 40.68 (10.45), 21-62 |
| **Sex (% female):** 80.5% |
| **Country:** Great Britain |
| **Type of company:** diverse |
| **Programs** | **Number of Intervention Groups:** 2 |
| **Intervention Group No. 1:** Intervention group (INT) |
| Setting: n.r. |
| Duration/Time: four weeks, 20-30min formal practice daily |
| % Mindfulness: 100% |
| Kind of mindfulness: similar to 8-week mindfulness program (MBSR) |
| Delivery: online |
| **Control Group No. 2:** Waitlist control (WLC) |
| Type of Control Group: waitlist control |
| **Outcomes** | **Time points for assessment:** pre-treatment (T1) and post-treatment (T2) and were followed up at three months (T3) and six months (T4) post-treatment |
| **Work-related rumination:** Work-Related Rumination Questionnaire (WRRQ, Cropley, Michalianou, Pravettoni, & Millward, 2012) |
| **Work-related fatigue:** Occupational Fatigue Exhaustion Recovery scale (OFER, Winwood, Bakker, & Winefield, 2007) |
| **Sleep quality:** Pittsburgh Sleep Quality Index (PSQI; Buysse, Reynolds III, Monk, Berman, & Kupfer, 1988) |
| **Mindfulness:** Five Facet Mindfulness Questionnaire Short form (FFMQ-SF; Bohlmeijer, ten Klooster, Fledderus, Veehof, & Baer, 2011) |
| **Notes** | n.a. |

Rao et al. (2017)

| **Citation** | Rao, M., Metri, K. G., Raghuram, N., & Hongasandra, N. R. (2017). Effects of mind sound resonance technique (yogic relaxation) on psychological states, sleep quality, and cognitive functions in female teachers: A randomized, controlled trial. *Advances in Mind-Body Medicine, 31*, 4-9. |
| --- | --- |
| **Aim of study** | “[…] to determine the efficacy of 1 month of MSRT practice on a number of variables, including psychological states, cognitive function, sleep quality, and fatigue in female teachers.” |
| **Methods** | **Study Design:** RCT |
| **Participants** | **Population:** Teacher |
| **Sample Size (randomized):** 60 |
| **Age in Years, M(SD):** 41,5 (8,5) |
| **Sex (% female):** 100% |
| **Country:** India |
| **Type of company:** school |
| **Programs** | **Number of Intervention Groups:** 1 |
| **Intervention Group No. 1:** MSRT Group |
| Setting: silent room |
| Duration/Time: 30 min/ day; 5 days/ week, 4 weeks |
| Kind of mindfulness: “The mind sound resonance technique (MSRT) is a  mindfulness-based yoga technique consisting of recitation of a mantra that repeatedly generates a sound resonance throughout the body” |
| Delivery: in-class |
| **Control Group No. 1:** control group |
| Type of Control Group: passive |
| **Outcomes** | **Time points for assessment:** pre-intervention, post-intervention |
| **Stress:** Perceived Stress Scale (PSS-10; Cohen, Kamarck & Mermelstein, 1983) |
| **Sleep Quality:** Pittsburgh Sleep Quality Index (PSQI; Buysse, Reynolds, Monk, Berman, & Kupfer, 1988) |
| **Cognitive Function:** Digit Letter Substitution Test (DLST) |
| **State Anxiety, Trait Anxiety:** State-Trait Anxiety Inventory for Adults (STAI-A; Spielberger, 2010) |
| **Psychological Distress:** general health questionnaire (GHQ-12; Goldberg & Williams, 1988) |
| **Self-esteem:** Rosenberg’s Self-Esteem Scale (RSES; Rosenberg, 1965) |
| **Notes** | n.a. |

Rexroth et al. (2017)

| **Pub title** | Rexroth, M., Michel, A., & Bosch, C. (2017). Promoting well-being by teaching employees how to segment their life domains. *Zeitschrift für Arbeits-und Organisationspsychologie A&O*. |
| --- | --- |
| **Aim of study** | “Based on boundary theory, this study aims to evaluate whether mindfulness as a cognitive–emotional segmentation strategy has not only positive effects on work–life balance-related outcomes” |
| **Methods** | **Study Design:** RCT |
| **Participants** | **Population:** working adults |
| **Sample Size (randomized):** 246 |
| **Age in Years, M(SD):** 41,41 (9,4) |
| **Sex (% female):** 71,1% |
| **Country:** Germany |
| **Type of company:** mixed |
| **Programs** | **Number of Intervention Groups:** 1 |
| **Intervention Group No. 1:** |
| Setting: online |
| Duration/Time: 3 weeks |
| Kind of mindfulness: “Building on boundary theory (Ashforth et al., 2000; Nippert-Eng, 1996) and a two-component model of mindfulness comprising self-regulation of attention and mindful orientation to experiences (Bishop et al., 2004), we composed an online-based intervention that should enable participants to better manage the boundary between their life domains.” |
| Delivery: online (audio) |
| **Control Group No. 1:** Wait-list control group |
| Type of Control Group: wait-list control |
| **Outcomes** | **Time points for assessment:** pre, post, follow-up (2 weeks) |
| **Mindfulness:** Cognitive and Affective Mindfulness Scale-Revised (CAMS-R; Feldman, Hayes, Kumar, Greeson, & Laurenceau, 2007) |
| **Burnout:** Oldenburg Burnout Inventory (OLBI; Demerouti, Bakker, Nachreiner, & Schaufeli, 2001; Demerouti et al., 2003) |
| **Life Satisfaction**: single-item scale (Lucas & Donnellan, 2011) |
| **Notes** | n.a. |

Roeser et al. (2013)

| **Pub title** | Roeser, R. W., Schonert-Reichl, K. A., Jha, A., Cullen, M., Wallace, L., Wilensky, R., ... & Harrison, J. (2013). Mindfulness training and reductions in teacher stress and burnout: Results from two randomized, waitlist-control field trials. *Journal of Educational Psychology, 105*, 787-804. |
| --- | --- |
| **Aim of study** | “Our purpose in this study was to test the feasibility and efficacy of a professional development program for teachers aimed at the reduction of job stress and symptoms of burnout through mindfulness training (MT).” |
| **Methods** | **Study Design:** RCT |
| **Participants** | **Population:** teachers |
| **Sample Size (randomized):** 113 |
| **Age in Years, M(SD):** 46,9 (9,2), 27-64 |
| **Sex (% female):** 89% |
| **Country:** Canada, U.S. |
| **Type of company:** public schools |
| **Programs** | **Number of Intervention Groups:** 1 |
| **Intervention Group No. 1:** Mindfulness group |
| Setting: after school |
| Duration/Time: 8 weeks, 11 sessions, 36hrs in total |
| Kind of mindfulness: Mindfulness Training Program (Benn, Akiva, Arel, & Roeser (2012)) |
| Delivery: in-class, homework |
| **Control Group No. 1:** Control group |
| Type of Control Group: waitlist control |
| **Outcomes** | **Time points for assessment:** Baseline/T1, post-program/T2 (after 8 week intervention), follow-up/T3 (after 3 months) |
| **Mindfulness:** Five Factor Mindfulness Questionnaire (FFM; Baer et al., 2008) |
| **Focused attention and WMC:** Operation Span Task (Ospan; Turner & Engle, 1989) |
| **Occupational self-compassion:** modified Neff’s Self-Compassion Scale (Neff, 2003) |
| **Occupational stress:** 7 items from Classroom Appraisal of Resources and Demands (CARD; Lambert, McCarthy, & Abbott-Shim, 2001) and 2 additional items used in another paper before (Roeser, & Medley, 1997) |
| **Occupational burnout:** Maslach Burnout Inventory (MBI; Maslach et al., 2001) |
| **Symptoms of anxiety and depression**: State subscale of the State–Trait Anxiety Inventory (STAI) for Adults (Kendall, Finch, Auerbach, Hooke, & Mikulka, 1976) and the Beck Depression Inventory (BDI; Beck, Steer, & Brown, 1996) |
| **Teacher absences from work:** teachers’ self-reported number of days absent from work due to illness as a behavioral indicator of stress and burnout |
| **Physiological indicators of stress**: indicators of sympathetic nervous arousal and limbic-hypothalamic-pituitary-adrenal (L-HPA) axis functioning; blood pressure; heart rate |
| **Salivary cortisol**: with a home stress kit |
| **Program acceptability and feasibility measures**: a MT program evaluation survey |
| **Notes** | n.a. |

Schroeder et al. (2016)

| **Pub title** | Schroeder, D. A., Stephens, E., Colgan, D., Hunsinger, M., Rubin, D., & Christopher, M. S. (2018). A brief mindfulness-based intervention for primary care physicians: a pilot randomized controlled trial. *American Journal of Lifestyle Medicine*, *12*, 83-91. |
| --- | --- |
| **Aim of study** | “[…] to explore whether a brief MBI, compared with a waitlist control group, would reduce burnout and stress and increase mindfulness, compassion, and resilience from baseline to 3-month follow-up in a group of physicians.” |
| **Methods** | **Study Design:** RCT, pilot |
| **Participants** | **Population:** health care providers |
| **Sample Size (randomized):** 33 |
| **Age in Years, M(SD):** 42,76 (8,43), 32-61 |
| **Sex (% female):** 73 |
| **Country:** USA |
| **Type of company:** family medicine and internal medicine departments at Providence Health and Services |
| **Programs** | **Number of Intervention Groups:** 1 |
| **Intervention Group No. 1:** experimental group |
| Setting: at the hospital but could not be scheduled during work time |
| Duration/Time: 4 weeks, 13-hour weekend training program plus 2-hour  follow-up sessions scheduled at 2 and 4 weeks after the weekend |
| Kind of mindfulness: “modified version of MBSR, with added elements of  compassion skills training, brief mindfulness techniques designed to be  used at work, and SLO (speaking, listening, observing) conversation exercises” |
| Delivery: in-class |
| **Control Group No. 1:** control group |
| Type of Control Group: waitlist control |
| **Outcomes** | **Time points for assessment:** pre, post, follow-up (after 3 months) |
| **Mindfulness:** Mindful Attention Awareness Scale (MAAS; Brown & Ryan, 2003) |
| **Resilience:** Brief Resilience Scale (BRS; Smith, Dalen, Wiggins, Tooley,  Christopher & Bernard, 2008) |
| **Stress:** Perceived Stress Scale (PSS-10; Cohen, Kamarck & Mermelstein, 1983)  **Compassion:** Santa Clara Brief Compassion Scale (SCBCS; Hwang, Plante & Lackey, 2008)  **Burnout:** Maslach Burnout Inventory (MBI; Maslach, & Jackson, 1981, 1986) |
| **Notes** | n.a. |

Sheppard et al. (1997)

| **Pub title** | Sheppard, W. D., Staggers Jr, F. J., & John, L. (1997). The effects of a stress management program in a high security government agency. *Anxiety, stress, and coping, 10*, 341-350. |
| --- | --- |
| **Aim of study** | “This study arose from a request to implement a stress management program in a high-security U.S. government agency worksite reported to be highly stressful. The task was to create a simple, but effective, short-term intervention that would alleviate the subjective perception of workplace stress that many of the employees were reporting. The agency already had a commercial stress management package within its health care department, “Manage Your Stress” (“Manage”, 1980), but it had fallen into disuse. We decided to resurrect this program as an educational control and measure its impact as well as that of a frequently researched meditation technique, Transcendental Meditation. For indicators of intervention impact we relied on blood pressure and self-report measures of well-being” (p. 342) |
| **Methods** | **Study Design:** RCT |
| **Participants** | **Population:** Managers (l5%), clerical (26%), and technical (59%) staff |
| **Sample Size (randomized):** 44 |
| **Age in Years, M(SD):** 50,5 (n.r.) |
| **Sex (% female):** 15% |
| **Country:** U.S. |
| **Type of company:** high-security government agency |
| **Programs** | **Number of Intervention Groups:** 1 |
| **Intervention Group No. 1:** TM group |
| Setting: at work |
| Duration/Time: 12 weeks, 1h-sessions every two weeks (11hrs.), 20min individual practice at home (5hrs.) |
| Kind of mindfulness: Transcendental Meditation (TM) |
| Delivery: in-class, individual practice |
| **Control Group No. 1:** CSM group |
| Type of Control Group: active (Corporate Stress Management) |
| **Outcomes** | **Time points for assessment:** Basline, 3 months (after intervention), 3 years (follow-up) |
| **Blood pressure:** () |
| **State and trait anxiety:** State-Trait Anxiety Inventory (Spielberger, Gorsuch, Lushene, Vagg, & Jacobs, 1983) |
| **Depression:** IPAT Depression Scale (Krug & Laughlin, 1976) |
| **Self-concept:** Tennessee Self-concept Scale (Roid & Fitts, 1989) |
| **Notes** | n.a. |

Shonin, 2014

| **Pub title** | Meditation awareness training (MAT) for work-related wellbeing and job performance: A randomised controlled trial. |
| --- | --- |
| **Aim of study** | The objective of the present study was to undertake an empirical investigation to evaluate the effect of a secular Buddhist-derived MBI known as Meditation Awareness Training (MAT; Van Gordon, Shonin, Sumich, Sundin, & Griffiths, 2014b) on work-related wellbeing and job performance in full-time employees |
| **Methods** | **Study Design:** RCT |
| **Participants** | **Population:** office-based employees with middle management responsibility |
| **Sample Size (randomized):** 152 |
| **Age in Years, M(SD):** 40,03 (8,39), MAT = 40.14 (8.11), Active Control = 39.91 (8.67) |
| **Sex (% female):** 56,9, MAT = 56.9%, Active Control = 56.9% |
| **Country:** UK |
| **Type of company:** mixed |
| **Programs** | **Number of Intervention Groups:** 2 |
| **Intervention Group No. 1:** MAT group |
| Setting: n.r. |
| Duration/Time: 8 weeks, one 90min workshop weekly |
| % Mindfulness: ?? |
| Kind of mindfulness: secular Buddhist-derived MBI known as Meditation Awareness Training (MAT; Van Gordon, Shonin, Sumich, Sundin, & Griffiths, 2014b) |
| Delivery: in-class, 2 one-to-one support session of 50min, daily practice |
| **Control Group No. 2:** Control group |
| Type of Control Group: active (cognitive-behavioural theory and principles) |
| **Outcomes** | **Time points for assessment:** Baseline, Endpoint (8 weeks), Follow-up (3 months) |
| **Work-Related Stress:** the UK Health and Safety Executive (HSE) Management Standards Work-related Stress Indicator (WSIT; Cousins, MacKay, Clarke, Kelly, Kelly, & McCaig, 2004) |
| **Job satisfaction:** Abridged Job in General Scale (AJIGS; Russel, Spitzmuller, Lin, Stanton, Smith, & Ironson, (2004) |
| **Emotional Distress:** Depression, Anxiety, and Stress Scale (DASS; Lovibond & Lovibond, 1995) |
| **Work performance:** Role-Based Performance Scale (RBPS; Welbourne, Johnson, & Erez, 1998) |

Singh et al. (2018)

| **Pub title** | Singh, N. N., Lancioni, G. E., Medvedev, O. N., Myers, R. E., Chan, J., McPherson, C. L., ... & Kim, E. (2018). Comparative effectiveness of caregiver training in mindfulness-based positive behavior support (MBPBS) and positive behavior support (PBS) in a randomized controlled trial. *Mindfulness*, 1-13. |
| --- | --- |
| **Aim of study** | “[…] aimed to evaluate the comparative effectiveness of training caregivers in MBPBS and PBS.” |
| **Methods** | **Study Design:** RCT |
| **Participants** | **Population:** caregivers from community group homes that provided services to people with intellectual and developmental disabilities |
| **Sample Size (randomized):** 123 |
| **Age in Years, M(SD):** 43,4 (9,28) |
| **Sex (% female):** 71% |
| **Country:** USA |
| **Type of company:** mixed |
| **Programs** | **Number of Intervention Groups:** 1 |
| **Intervention Group No. 1: MBPBS** |
| Setting: at work |
| Duration/Time: 7-day course spread over 10 weeks |
| Kind of mindfulness: MBPBS (mindfulness based positive behavior support) |
| Delivery: in-class |
| **Control Group No. 1: PBS** |
| Type of Control Group: active control (positive behavior support) |
| **Outcomes** | **Time points for assessment:** pre, post |
| **Stress:** Perceived Stress Scale-10 (PSS-10; Cohen et al. 1983) |
| **Quality of life:** Professional Quality of Life (ProQOL; Stamm, 2010) |
| **Notes** | n.a. |

Song and Lindquist (2015)

| **Pub title** | Song, Y., & Lindquist, R. (2015). Effects of mindfulness-based stress reduction on depression, anxiety, stress and mindfulness in Korean nursing students. *Nurse education today, 35*, 86-90. |
| --- | --- |
| **Aim of study** | “the purpose of this study was to examine whether MBSR is effective, and has potential as an intervention to decrease depression, anxiety and stress, and to improve mindfulness of Korean nursing students.” |
| **Methods** | **Study Design:** RCT |
| **Participants** | **Population:** undergraduate nursing students (1st–4th grades) from KN University College of Nursing in South Korea |
| **Sample Size (randomized):** 50 |
| **Age in Years, M(SD):** MBSR: 19.6 (1.7); WL: 19.5 (2.0) |
| **Sex (% female):** MBSR: 81%; WL: 82.6% |
| **Country:** South Korea |
| **Type of company:** University College of Nursing |
| **Programs** | **Number of Intervention Groups:** 1 |
| **Intervention Group No. 1:** MBSR treatment group |
| Setting: n.r. |
| Duration/Time: 8 weeks, weekly one 2h session |
| Kind of mindfulness: MBSR; main contents were the standard elements of yoga, sitting, walking, breath-work, body scan, and eating meditation |
| Delivery: in-class |
| **Control Group No. 1:** waiting-list control group |
| Type of Control Group: waitlist control |
| **Outcomes** | **Time points for assessment:** pretest- posttest |
| **Depression, Anxiety, Stress:** Depression, Anxiety and Stress Scale-21 (DASS-21; Psychology Foundation of Australia, 2013) |
| **Mindfulness:** Mindfulness Attention Awareness Scale (MAAS) Korean version (Park, 2006) |
| **Notes** | n.a. |

Steinberg et al. (2017)

| **Pub title** | Steinberg, B. A., Klatt, M., & Duchemin, A. M. (2017). Feasibility of a mindfulness-based intervention for surgical intensive care unit personnel. *American Journal of Critical Care*, *26*, 10-18. |
| --- | --- |
| **Aim of study** | “[…] to determine the feasibility of this intervention in a real-world working population.” |
| **Methods** | **Study Design:** RCT, pilot |
| **Participants** | **Population:** hospital health care workers (Surgical Intensive Care Unit) |
| **Sample Size (randomized):** 32 |
| **Age in Years, M(SD):** 44,1 (11,5) |
| **Sex (% female):** 88% |
| **Country:** USA |
| **Type of company:** large academic medical center (level I trauma center) |
| **Programs** | **Number of Intervention Groups:** 1 |
| **Intervention Group No. 1:** MBI group |
| Setting: at work (conference room) during work hours |
| Duration/Time: 1h/ session, 1 session/ week, 8 weeks |
| Kind of mindfulness: “combination of mindfulness and light yoga practices with music” |
| Delivery: in-class |
| **Control Group No. 1:** Wait-list control group |
| Type of Control Group: wait-list control |
| **Outcomes** | **Time points for assessment:** pre, post (after 8 week intervention) |
| **Burnout:** Maslach Burnout Inventory (MBI; Maslach, Jackson & Leiter, 1996) |
| **Professional Quality of Life:** ProQOL (Stamm, 2005) |
| **Work Engagement:** Utrecht Work Engagement Scale (UWES; Schaufeli, Bakker & Salanova, 2006) |
| **Notes** | n.a. |

Strub and Tarquinio (2013)

| **Pub title** | Strub, L., & Tarquinio, C. (2013). Effets de la Mindfulness-Based Cognitive Therapy (MBCT) sur le stress et les symptômes associés dans un contexte industriel: Une étude-pilote contrôlée et randomisée. *Santé mentale au Québec, 38*, 207-225. |
| --- | --- |
| **Aim of study** | **“**The transposition of the princeps model has been the subject of a controlled and randomized experimental trial performed on a non-clinical population working in an industrial environment to assess the effect of the aforesaid program on stress and associated symptoms.“ |
| **Methods** | **Study Design:** RCT, Pilot |
| **Participants** | **Population:** employes, managers europeens, managers de departement, et superviseurs de department |
| **Sample Size (randomized):** 20 |
| **Age in Years, M(SD):** n.r. (n.r.) |
| **Sex (% female):** 40% female |
| **Country:** Luxembourg |
| **Type of company:** d’une usine de metallurgie |
| **Programs** | **Number of Intervention Groups: 1** |
| **Intervention Group No. 1:** MBCT group |
| Setting: at work |
| Duration/Time: for 4h session every two months |
| Kind of mindfulness: MBCT and “here-and-now”-exercises |
| Delivery: in-class and practice at home |
| **Control Group No. 1:** control group |
| Type of Control Group: passive |
| **Outcomes** | **Time points for assessment:** pre, post |
| **Perceived stress:** Perceived Stress Scale (PSS; Cohen, Kamarck, & Mermelstein, 1983 ; Cohen, & Williamson, 1988) |
| **Work-related stress:** Le stress au travail (Legeron., 2003) |
| **Burnout:** Maslach Burnout Inventory (MBI; Maslach, & Jackson, 1981, 1986) |
| **General health:** General Health Questionnaire (GHQ-28; Goldberg, & Hillier (1979) |
|  | **Depression:** Beck Depression Inventory (BDI; Beck et al., 1961) |
| **Notes** | n.a. |

Tagg, 2016

| **Pub title** | Decreasing Stress In Paraprofessionals Working With Children With Autism Using A Brief, Blended Mindfulness Intervention |
| --- | --- |
| **Aim of study** | “1. Will participation in the blended stress-reduction program decrease the perceived stress of the ABA paraprofessionals?  2. Will participation in the blended stress-reduction program decrease the level of occupational burnout of the ABA paraprofessionals?  3. Will participation in the blended stress-reduction program increase the mindfulness behaviors of the ABA paraprofessionals?” |
| **Methods** | **Study Design:** RCT |
| **Participants** | **Population:** ABA paraprofessionals |
| **Sample Size (randomized):** 70 |
| **Age in Years, M(SD):** 22 (n.r.), 18-51 |
| **Sex (% female):** n.r. |
| **Country:** USA |
| **Type of company:** agencies which provide Applied Behavior Analysis (ABA) services to children with a diagnosis of or at risk ASD |
| **Programs** | **Number of Intervention Groups:** 2 |
| **Intervention Group No. 1:** Mindfulness Group |
| Setting: n.r. |
| Duration/Time: 2h workshop on day one, then 9-11min guided mindfulness activities during the next four days as homework |
| % Mindfulness: 100% |
| Kind of mindfulness: Kabat-Zinn |
| Delivery: in-class, homework |
| **Control Group No. 2:** ABA Group |
| Type of Control Group: active |
| **Outcomes** | **Time points for assessment:** Pre-test (within the three days before the start of the intervention period), Post-test (within two days of the end of the intervention period) |
| **Burnout:** Maslach Burnout Inventory – Human Services Inventory (MBI-HSS) (Maslach Burnout Inventory Manual, 1996) |
| **Perceived stress:** Perceived Stress Scale - 10 Items (PSS-10; Cohen, Kamarck, & Mermelstein, 1983) |
| **Mindfulness:** Five Facet Mindfulness Questionnaire (FFMQ; Baer, Smith, Hopkins, Krietemeyer, & Toney, 2006) |
| **Notes** | n.a. |

Taylor et al. (2016)

| **Pub title** | Taylor, C., Harrison, J., Haimovitz, K., Oberle, E., Thomson, K., Schonert-Reichl, K., & Roeser, R. W. (2016). Examining ways that a mindfulness-based intervention reduces stress in public school teachers: A mixed-methods study. *Mindfulness, 7*, 115-129. |
| --- | --- |
| **Aim of study** | “to examine four potential ways by which the MBI reduced teacher stress, including by (1) increasing their efficacy for regulating emotion on the job; (2) improving their ways of coping with stress at work; (3) increasing their efficacy for forgiving colleagues and students at work following conflict, as well as the tendency to do so; and (4) increasing teachers’ tendency to feel compassion for people generally, and for challenging students in particular” |
| **Methods** | **Study Design:** RCT |
| **Participants** | **Population:** elementary and secondary schoolteachers |
| **Sample Size (randomized):** 59 |
| **Age in Years, M(SD):** median = 47 (n.r.), 28-63 |
| **Sex (% female):** 90% female |
| **Country:** Canada |
| **Type of company:** publicschools |
| **Programs** | **Number of Intervention Groups:** 1 |
| **Intervention Group No. 1:** Mindfulness training group |
| Setting: in a public school setting |
| Duration/Time: 9 weeks, 11 sessions, 36 total contact hours plus 16 hours homework |
| Kind of mindfulness: Stress Management and Relaxation Training (SMART; Cullen and Brito 2014) |
| Delivery: in-class, homework |
| **Control Group No. 1:** Waitlist control group |
| Type of Control Group: waitlist control |
| **Outcomes** | **Time points for assessment:** pre, post (after 9 week intervention), follow-up (4 months post-intervention) |
| **Occupational Stress:** 7 items from the Classroom appraisal of resources and demands: school-age version (CARD; Lambert, McCarthy, & Abbott-Shim, 2001) and two additional items |
| **Efficacy for Regulating Emotion at Work:** nine self-created items |
| **Dispositional Compassion:** Santa Clara Brief Compassion Scale (Hwang. Plante, & Lackey 2008) |
| **Dispositional and Situation-Specific Forgiveness:** Tendency to Forgive scale (TFF; Brown, & Ryan, 2003), stimulated-recall method of assessing forgiveness (Brown, & Phillips, 2005) |
| **Efficacy for Forgiving Others at Work:** two self-created items |
| **Teachers’ Coping at Work:** interview |
| **Notes** | n.a. |

Valley et al. (2017)

| **Pub title** | Valley, M. A., & Stallones, L. (2017). Effect of mindfulness-based stress reduction training on health care worker safety. *Journal of Occupational and Environmental Medicine, 59*, 935-941. |
| --- | --- |
| **Aim of study** | “[…] to determine: (1) the MBSR intervention results in a greater decrease in cognitive failure […]; (2) the MBSR intervention results in a greater increase in safety compliance […]; (3) the MBSR intervention results in a greater increase in safety participation […]; (4) if the  MBSR program leads to a sustained decrease in self-reported  workplace cognitive failure and safety compliance and participation  among hospital care workers 6 months after completing the intervention.” |
| **Methods** | **Study Design:** RCT |
| **Participants** | **Population:** hospital health care workers |
| **Sample Size (randomized):** 23 |
| **Age in Years, M(SD):** n.r |
| **Sex (% female):** 91% |
| **Country:** Colorado |
| **Type of company:** hospital |
| **Programs** | **Number of Intervention Groups:** 1 |
| **Intervention Group No. 1:** Mindfulness-based Stress Reduction (MBSR) |
| Setting: n.r. |
| Duration/Time: 8 weeks, 2,5-hour weekly sessions plus one 7-hour session |
| Kind of mindfulness: guided instruction in mindfulness meditation focusing on breathing, gentle stretching and yoga, and group discussions about improving awareness |
| Delivery: in-class |
| **Control Group No. 1:** Wait-list control group |
| Type of Control Group: wait-list control |
| **Outcomes** | **Mindfulness:** Mindfulness Attention Awareness Scale (MAAS; Brown & Ryan, 2003) |
| **Productivity:** Workplace Cognitive Failure (Wallace & Chen, 2005) |
| **Workplace Safety Performance:** Workplace Safety Performance (Neal, Griffin & Hart, 2000) |
| **Notes** | n.a. |

Verweij et al. (2018)

| **Pub title** | Verweij, H., van Ravesteijn, H., van Hooff, M. L., Lagro-Janssen, A. L., & Speckens, A. E. (2018). Mindfulness-based stress reduction for residents: A randomized controlled trial. *Journal of General Internal Medicine*, *33*, 429-436. |
| --- | --- |
| **Aim of study** | “[…] to determine the effectiveness of MBSR in reducing burnout in residents.” |
| **Methods** | **Study Design:** RCT |
| **Participants** | **Population:** Residents |
| **Sample Size (randomized):** 148 |
| **Age in Years, M(SD):** 31,2 (4,6) |
| **Sex (% female):** 88% |
| **Country:** Netherlands |
| **Type of company:** University Medical Center |
| **Programs** | **Number of Intervention Groups:** 1 |
| **Intervention Group No. 1:** Intervention group |
| Setting: n. r. |
| Duration/Time: 2,5h/ session, 1 session/week, 8 weeks |
| Kind of mindfulness: MBSR-program including body scan, yoga, meditation and psycho-education about stress |
| Delivery: in-class |
| **Control Group No. 1:** waitlist control group |
| Type of Control Group: waitlist control |
| **Outcomes** | **Time points for assessment:** Pretest; Posttest |
| **Burnout:** Maslach Burnout Inventory(MBI; Maslach et al.,1986) |
| **Subsyndromal Symptoms:** Penn State Worry Questionnaire (Meyer, Miller, Metzger & Borkovec, 1990) |
| **Work-Home-Conflict:** Survey Work-home Interaction NijmeGen(SWING; Geurts, Taris, Kompier, Dikkers, Van Hooff & Kinnunen, 2005) |
| **Mindfulness:** Mindfulness Questionnaire Short Form (Bohlmeijer, ten Klooster, Fledderus, Veehof & Baer, 2011) |
| **Self-Compassion:** Self-Compassion Scale Short Form(Raes, Pommier, Neff & Van Gucht, 2011) |
| **Well-being:** Mental Health Continuum-Short Form(MHCSF; Keyes,2002) |
| **Empathy:** Jefferson Scale of Physician Empathy(Hojat, Mangione, Nasca et al., 2001) |
| **Productivity:** Questions regarding *medical errors* developed by Pins et al. (Prins, Van der Heijden, Hoekstra-Weebers et al., 2009) |
| **Notes** | n.a. |

Wilson (2012)

| **Pub title** | Wilson, D. M. (2012). Effects of Mindfulness-Based Art Processing (MBAP) on the well-being and job performance of working adults: Evaluating a novel intervention (Doctoral dissertation, Institute of Transpersonal Psychology). |
| --- | --- |
| **Aim of study** | **“**The present study assessed the effects of a novel mindfulness-based intervention, Mindfulness-Based Art Processing (MBAP), on the well-being and job performance of a working adult population. Essentially, MBAP combines positive psychology and art processing techniques with mindfulness-based practices, such as those found in a low-dose mindfulness-based stress reduction (MBSR-ld) program in an attempt to synergize the benefits of each modality“ |
| **Methods** | **Study Design:** RCT |
| **Participants** | **Population:** a company specialized in information technology (2000 employees), a company specialized in clean energy resources (1000 employees, a specialized in wellness services, such as massage therapy, acupuncture, and energy healing (200 employees), and an organization comprising of mental health and social service practitioners (150 employees) |
| **Sample Size (randomized):** 80 |
| **Age in Years, M(SD):** n.r. (n.r.); 23-64 |
| **Sex (% female):** 66,3% |
| **Country:** Austin, Texas |
| **Type of company:** three diverse companies and a non-profit organization |
| **Programs** | **Number of Intervention Groups:** 2 |
| **Intervention Group No. 1:** MBSR-low-dose (MBSR-ld) |
| Setting: n.r. |
| Duration/Time: 8 weeks, 1-hour weekly meetings, 4x 20min individual practice at work weekly (with CD and DVD) |
| Kind of mindfulness: to be trained in the mindfulness activities outlined by the MBSR-ld program (Klatt et al., 2009) |
| Delivery: in-class, homework |
| **Intervention Group No. 2:** MBAP group |
| Setting: n.r. |
| Duration/Time: 8 weeks, 1hr weekly session, 4x 20min homework activities each week |
| Kind of mindfulness: Mindfulness-Based Art Processing (MBAP) is oriented towards increasing mindful awareness and well-being; participants engaged in multiple mindfulness activities and completed a number of art projects with different mediums. They processed their experiences and art by themselves, in dyads, and in small and large groups; Mindfulness-based art therapy (MBAT; Monti et al., 2006) |
| Delivery: in-class, homework |
| **Control Group No. 1:** No-treatment group (No-Tx) |
| Type of Control Group: |
| **Outcomes** | **Time points for assessment:** pre-treatment, post-treatment, 4-week follow-up |
| **Work motivation:** Work Motivation Form-Employee (WMF-E; Deci & Ryan, 1985; Kasser, Davey, & Ryan, 1992) |
| **Work engagement:** Utrecht Work Engagement Scale (UWES; Schaufeli & Bakker, 2003) |
| **Subjective well-being:** Satisfaction with Life Scale (SWLS; Diener et al., 1985) |
| **Psychological well-being:** Scales of Psychological Well-being (SPWB; Ryff, 1989) |
| **Perceived stress:** Perceived Stress Scale (PSS-10; Cohen, Kamarck, & Mermelstein, 1983) |
| **Sleep quality:** Pittsburgh Sleep Quality Index (PSQI; Buysse, Reynolds, Monk, Berman, & Kupfer, 1988) |
| **Mindfulness:** Five Facet Mindfulness Questionnaire (FFMQ; Baer, Smith, Hopkins, Krietemeyer, & Toney, 2006; Baer, Smith, Lykins, Button, Krietemeyer, & Sauer, 2008) |
| **Notes** | n.a. |

Wolever et al. (2012)

| **Pub title** | Wolever, R. Q., Bobinet, K. J., McCabe, K., Mackenzie, E. R., Fekete, E., Kusnick, C. A., & Baime, M. (2012). Effective and viable mind-body stress reduction in the workplace: A randomized controlled trial. *Journal of occupational health psychology, 17*, 246-258. |
| --- | --- |
| **Aim of study** | **“**We propose to expand the current literature by using a larger RCT to evaluate the effectiveness of two mind-body workplace stress reduction programs designed to be highly accessible to employees: a mindfulness-based stress management intervention and a therapeutic yoga-based stress reduction program.” |
| **Methods** | **Study Design:** RCT |
| **Participants** | **Population:** employees of a national insurance carrier |
| **Sample Size (randomized):** 239 |
| **Age in Years, M(SD):** 42,9 (n.r.); Control: 42.7 (9.7), Mindfulness: 44.3 (9.4), Yoga: 41.6 (10.1) |
| **Sex (% female):** 76,6% (Control = 81,1%, Mindfulness = 77,1%, Yoga = 73,3%) |
| **Country:** U.S.A. |
| **Type of company:** insurancecarrier |
| **Programs** | **Number of Intervention Groups:** 2 |
| **Intervention Group No. 1:** Mindfulness Group |
| Setting: two Mindfulness at Work programs designed to be delivered at worksites |
| Duration/Time: 12 weeks, 14-hours long, one hour weekly, 2-hr session at week 10 |
| Kind of mindfulness: The Mindfulness at Work program teaches mindfulness practices that explicitly target work-related stress, work-life balance, and self-care. These practices are relatively brief (5–15 min) and are specifically designed to be used at work. The program itself is also designed to be delivered at worksites; Baer, 2003; Kabat-Zinn, 1994; Wilbur, Engler & Brown, 1984 |
| Delivery: one group in-person in a classroom and other group online virtual classroom that allowed for real-time bidirectional communication |
| **Intervention Group No. 2:** Yoga group |
| Setting: at two worksites (one in Hartford, CT and one in Walnut Creek, CA) |
| Duration/Time: 12 weeks, one hour weekly |
| Kind of mindfulness: Viniyoga Stress Reduction Programm (American Viniyoga Institute AVI), for managing stress including asanas (physical postures of yoga), breathing techniques, guided relaxation, mental techniques, and education about starting a home practice |
| Delivery: in-class, instructional handouts for short yoga breaks at home and at work and 50% received a DVD to support home practice |
| **Control Group No. 1:** control group |
| Type of Control Group: passive control (controls were given a list of resources available to all employees of the national insurance carrier with discounted fitness programs, employee assistance programs, behavioral health services for depression, chair massage sessions, and wellness coaching opportunities) |
| **Outcomes** | **Time points for assessment:** pre, post |
| **PSS total score:** Perceived Stress Scale (PSS; Cohen, Kamarck, & Mermelstein, 1983) |
| **Sleep quality:** Pittsburgh Sleep Quality Index (PSQI; Buysse, Reynolds, Monk, Berman, & Kupfer, (1989) |
| **Mood and pain:** Center for Epidemiological Studies Depression Scale (CES-D; Radloff, 1977) |
| **Productivity:** Work Limitations Questionnaire (WLQ; Lerner, Amick, Rogers, Malspeis, Bungay, & Cynn, 2001) |
| **Mindfulness:** Cognitive and Affective Mindfulness Scale-Revised (CAMS-R; Feldman, Hayes, Kumar, Greeson, & Laurenceau, 2007) |
| **Blood pressure, breathing rate, HRV** |
| **Notes** | n.a. |

Yang et al. (2018)

| **Pub title** | Yang, J., Tang, S., & Zhou, W. (2018). Effect of mindfulness-based stress reduction therapy on work stress and mental health of psychiatric nurses. *Psychiatria Danubina, 30*, 189-196. |
| --- | --- |
| **Aim of study** | “[…], stress intervention on psychiatric nurses was conducted through the use of mindfulness therapy, and the effect of such intervention on the  mental health of psychiatric nurses was examined.” |
| **Methods** | **Study Design:** RCT |
| **Participants** | **Population:** PsychiatricNurses |
| **Sample Size (randomized):** 100 |
| **Age in Years, M(SD):** 29,5 (7,1) |
| **Sex (% female):** 68% |
| **Country:** China |
| **Type of company:** hospital |
| **Programs** | **Number of Intervention Groups:** 1 |
| **Intervention Group No. 1:** |
| Setting: nurse station |
| Duration/Time: 8 weekly sessions |
| Kind of mindfulness: relaxation, mindfulness breathing, mindfulness meditation |
| Delivery: in-class |
| **Control Group No. 1:** control group |
| Type of Control Group: active control group |
| **Outcomes** | **Time points for assessment:** pre-intervention, post-intervention |
| **General Distress:** Symptom Checklist 90 (SCL; Wang, Yu, Shen, Ye, Hu, Yu et al. 2017) |
| **Depression:** Self-Rating Depression Scale (SDS; Peng, Zhang, Tan, Li, Yan et al., 2013) |
| **Anxiety:** Self-Rating Anxiety Scale (SAS; Hao, Li, Yang, Yang & Petridis, 2016) |
| **Stress:** Nursing Stress Scale (NSS; Li & Liu, 2000) |
| **Notes** | n.a. |

Żołnierczyk-Zreda et al. (2016)

| **Pub title** | Żolnierczyk-Zreda, D., Sanderson, M. & Bedyńska, S. (2016). Mondfulness-based stress reduction for managers: A randomized controlled study. *Occupational Medicine, 66*, 630-635. |
| --- | --- |
| **Aim of study** | “To examine the potential for work-related stress management using MBSR for middle-level Managers who are considered to be particularly affected by the negative effects of stress related to organizational restructuring.” |
| **Methods** | **Study Design:** RCT |
| **Participants** | **Population:** Middle-level managers |
| **Sample Size (randomized):** 156 |
| **Age in Years, M(SD):** 39,4 (8,4), 28-56 |
| **Sex (% female):** 49% female |
| **Country:** Poland |
| **Type of company:** companies in the financial and service sectors, such  as insurance companies, banks and advertising agencies |
| **Programs** | **Number of Intervention Groups:** 1 |
| **Intervention Group No. 1:** MBSR group |
| Setting: n.r. |
| Duration/Time: 8 weeks, weekly 180-min group sessions, one 7h session |
| Kind of mindfulness: MBSR |
| Delivery: in-class and homework (6x 20min each week) |
| **Control Group No. 1:** control group |
| Type of Control Group: waitlist control |
| **Outcomes** | **Time points for assessment:** pre-intervention, post-intervention |
| **Work-related stress:** Occupational Stress Indicator (OSI-2; Cooper, Sloan, Williams, 1988) |
| **Positive and negative affect:** Bradburn’s Affect Experience Index (AEI; Bradburn, 1969) |
| **Self-esteem:** Rosenberg Self-Esteem Scale (RSES; Rosenberg, 1965) |
| **Subjectively perceived physical health:** Health Questionnaire (HQ) scale (Widerszal-Bazyl, Cieślak, & Najmiec, 1995) |
| **Notes** | n.a. |

Appendix B: Plots for all Review Outcomes: Forest Plots, Funnel Plots, Outlier (Cook’s distance) and Egger’s Test for Funnel Plot Asymmetry (Publication Bias)

- **B1.1:** Mindfulness Post-Intervention (pp. 76-77)
- **B1.2:** Mindfulness Follow-Up (p.78)
- **B2.1:** Wellbeing Post-Intervention (pp. 79-80)
- **B2.2:** Wellbeing Follow-Up (p. 81)
- **B3.1:** Compassion Post-Intervention (p. 82)
- **B3.2:** Compassion Follow-Up (p. 83)
- **B4.1:** Stress Post-Intervention (pp. 84-85)
- **B4.2:** Stress Follow-Up (p. 86)
- **B5.1:** Subynd. Symptoms Post-Intervention (pp. 87-88)
- **B5.2:** Subsynd. Symptoms Follow-Up (p. 89)
- **B6.1:** Burnout Post-Intervention (pp. 90-91)
- **B6.2:** Burnout Follow-Up (p. 92)
- **B7.1:** Somatization / Phsyical Illness Post-Intervention (p. 93)
- **B8.1:** Work Engagement Post-Intervention (p. 94)
- **B9.1:** Productivity Post-Intervention (p. 95)
- **B10.1:** Job Satisfaction Post-Intervention (p. 96)
- **B11.1:** Resilience Post-Intervention (p. 97)

In the **forest plots**, each box represents a standardized mean comparison score (Hedges’ g) of the mindfulness vs. control group in a certain primary study. The box sizes symbolize the inverse of the sampling variance, resulting in larger dots for more precise studies or larger sample sizes, respectively. Error bars indicate 95% Confidence Intervals.

In the **funnel plots**, standardized mean comparison scores and study precision scores (standard error) are presented.

**Cook’s distance** is a statistical method to examine what effect the deletion of single studies has on the fitted values of all studies simultaneously (Cook & Weisberg, 1982). According to Viechtbauer & Cheung (2010), the Cook’s distance value can be interpreted as the Mahalanobis distance between the entire set of predicted values once with the single study included and once with the single study excluded from the model fitting.

**Egger’s regression** test was used to analyze funnel plot asymmetry (Egger, Smith, Schneider, & Minder, 1997). For the regression test for funnel plot asymmetry a weighted regression model with multiplicative dispersion and standard error as predictor was used. Significance indicates funnel plot asymmetry, which in turn indicates a high risk of publication bias.

**B1.1: Mindfulness Post-Intervention**

**B1.1.1: Forest Plot**

**B1.1.2: Funnel Plot**

**B1.1.3: Outlier Analysis (Cook’s distance)**

**B1.1.4: Egger’s Regression Test for Funnel Plot Asymmetry**

Predictor: Standard Error

*t*(30) = 2.88, *p* < .01

**B1.2: Mindfulness Follow-Up**

**B1.2.1: Forest Plot**

**B1.2.2: Funnel Plot**

**B1.2.3: Outlier Analysis (Cook’s distance)**

**B1.2.4: Egger’s Regression Test for Funnel Plot Asymmetry**

Predictor: Standard Error

*t*(9) = 0.70, *p* = .504

**B2.1: Wellbeing Post-Intervention**

**B2.1.1: Forest Plot**

**B2.1.2: Funnel Plot**

**B2.1.3: Outlier Analysis (Cook’s distance)**

**B2.1.4: Egger’s Regression Test for Funnel Plot Asymmetry**

Predictor: Standard Error

*t*(20) = 1.14, *p* = .269

**B2.2: Wellbeing Follow-Up**

**B2.2.1: Forest Plot**

**B2.2.2: Funnel Plot**

**B2.2.3: Outlier Analysis (Cook’s distance)**

**B2.2.4: Egger’s Regression Test for Funnel Plot Asymmetry**

Predictor: Standard Error

*t*(7) = 1.71, *p* = .131

**B3.1: Compassion Post-Intervention**

**B3.1.1: Forest Plot**

**B3.1.2: Funnel Plot**

**B3.1.3: Outlier Analysis (Cook’s distance)**

**B3.1.4: Egger’s Regression Test for Funnel Plot Asymmetry**

Predictor: Standard Error

*t*(6) = 0.45, *p* = .667

**B3.2: Compassion Follow-Up**

**B3.2.1: Forest Plot**

**B3.2.2: Funnel Plot**

**B3.2.3: Outlier Analysis (Cook’s distance)**

**B3.2.4: Egger’s Regression Test for Funnel Plot Asymmetry**

Predictor: Standard Error

*t*(3) = -0.12, *p* = .912

**B4.1: Stress Post-Intervention**

**B4.1.1: Forest Plot**

**B4.1.2: Funnel Plot**

**B4.1.3: Outlier Analysis (Cook’s distance)**

**B4.1.4: Egger’s Regression Test for Funnel Plot Asymmetry**

Predictor: Standard Error

*t*(41) = -2.61, *p* = .013

**B4.2: Stress Follow-Up**

**B4.2.1: Forest Plot**

**B4.2.2: Funnel Plot**

**B4.2.3: Outlier Analysis (Cook’s distance)**

**B4.2.4: Egger’s Regression Test for Funnel Plot Asymmetry**

Predictor: Standard Error

*t*(13) = -1.27, *p* = .220

**B5.1: Subsynd. Symptoms Post-Intervention**

**B5.1.1: Forest Plot**

**B5.1.2: Funnel Plot**

**B5.1.3: Outlier Analysis (Cook’s distance)**


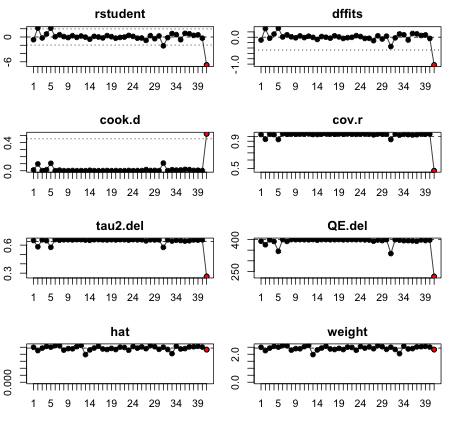


**B5.1.4: Egger’s Regression Test for Funnel Plot Asymmetry**

Predictor: Standard Error

*t*(38) = -1.98, *p* = .055

**B5.2: Subsynd. Symptoms Follow-Up**

**B5.2.1: Forest Plot**

**B5.2.2: Funnel Plot**

**B5.2.3: Outlier Analysis (Cook’s distance)**

**B5.2.4: Egger’s Regression Test for Funnel Plot Asymmetry**

Predictor: Standard Error

*t*(12) = -1.66, *p* = .120

**B6.1: Burnout Post-Intervention**

**B6.1.1: Forest Plot**

**B6.1.2: Funnel Plot**

**B6.1.3: Outlier Analysis (Cook’s distance)**

**B6.1.4: Egger’s Regression Test for Funnel Plot Asymmetry**

Predictor: Standard Error

*t*(20) = 0.61, *p* = .546

**B6.2: Burnout Follow-Up**

**B6.2.1: Forest Plot**

**B6.2.2: Funnel Plot**

**B6.2.3: Outlier Analysis (Cook’s distance)**

**B6.1.4: Egger’s Regression Test for Funnel Plot Asymmetry**

Predictor: Standard Error

*t*(7) = 0.04, *p* = .971

**B7.1: Somatization & Physical Illness Post-Intervention**

**B7.1.1: Forest Plot**

**B7.1.2: Funnel Plot**

**B7.1.3: Outlier Analysis (Cook’s distance)**

**B7.1.4: Egger’s Regression Test for Funnel Plot Asymmetry**

Predictor: Standard Error

*t*(4) = -0.49, *p* = .650

**B8.1: Work Engagement Post-Intervention**

**B8.1.1: Forest Plot**

**B8.1.2: Funnel Plot**

**B8.1.3: Outlier Analysis (Cook’s distance)**

**B8.1.4: Egger’s Regression Test for Funnel Plot Asymmetry**

Predictor: Standard Error

*t*(3) = 2.95, *p* = .060

**B9.1: Productivity Post-Intervention**

**B9.1.1: Forest Plot**

**B9.1.2: Funnel Plot**

**B9.1.3: Outlier Analysis (Cook’s distance)**

**B9.1.4: Egger’s Regression Test for Funnel Plot Asymmetry**

Predictor: Standard Error

*t*(7) = 0.44, *p* = .676

**B10.1: Job Satisfaction Post-Intervention**

**B10.1.1: Forest Plot**

**B10.1.2: Funnel Plot**

**B10.1.3: Outlier Analysis (Cook’s distance)**

**B10.1.4: Egger’s Regression Test for Funnel Plot Asymmetry**

Predictor: Standard Error

*t*(5) = -0.08, *p* = .939

**B11.1: Resilience Post-Intervention**

**B11.1.1: Forest Plot**

**B11.1.2: Funnel Plot**

**B11.1.3: Outlier Analysis (Cook’s distance)**

**B11.1.4: Egger’s Regression Test for Funnel Plot Asymmetry**

Predictor: Standard Error

*t*(2) = 0.82, *p* = .497

**Appendix C: Table of all moderator analyses**

*Table C.1*. Moderator analyses for participant, program and study-design characteristics

|  | Mindfulness | | | |  | Wellbeing | | | |  | Stress | | | |  | Subsyn. Symptoms | | | |  | Burnout | | | |
| --- | --- | --- | --- | --- | --- | --- | --- | --- | --- | --- | --- | --- | --- | --- | --- | --- | --- | --- | --- | --- | --- | --- | --- | --- |
|  | *k* | *Q* | *df* | *p* |  | *k* | *Q* | *df* | *p* |  | *k* | *Q* | *df* | *p* |  | *k* | *Q* | *df* | *p* |  | *k* | *Q* | *df* | *p* |
| Participant |  |  |  |  |  |  |  |  |  |  |  |  |  |  |  |  |  |  |  |  |  |  |  |  |
| age | 28 | 2.97 | 1 | .085 |  | 19 | 0.00 | 1 | .995 |  | 36 | 0.13 | 1 | .720 |  | 35 | 0.59 | 1 | .442 |  | 19 | 0.70 | 1 | .404 |
| gender | 31 | 1.55 | 1 | .214 |  | 22 | 6.76 | 1 | .009 |  | 41 | 2.84 | 1 | .092 |  | 39 | 0.25 | 1 | .620 |  | 40 | 0.49 | 1 | .486 |
| education | 8 | 1.26 | 1 | .261 |  | 5 | 6.12 | 1 | .013 |  | 12 | 3.33 | 1 | .068 |  | 14 | 10.02 | 1 | .002 |  | 6 | 0.04 | 1 | .846 |
| work experience | 12 | 6.13 | 1 | .013 |  | 6 | 0.74 | 1 | .390 |  | 13 | 0.32 | 1 | .569 |  | 12 | 0.74 | 1 | .390 |  | 10 | 8.67 | 1 | .003 |
| profession1 | 32 | 7.59 | 7 | .370 |  | 22 | 21.39 | 7 | .003 |  | 43 | 5.93 | 9 | .747 |  | 40 | 2.91 | 9 | .968 |  | 22 | 3.22 | 5 | .666 |
| Program |  |  |  |  |  |  |  |  |  |  |  |  |  |  |  |  |  |  |  |  |  |  |  |  |
| MBI-type2 | 32 | 6.88 | 6 | .332 |  | 22 | 6.82 | 7 | .448 |  | 43 | 11.14 | 8 | .194 |  | 40 | 9.77 | 7 | .202 |  | 22 | 10.48 | 7 | .163 |
| hours of attendance | 30 | 5.11 | 1 | .024 |  | 21 | 7.75 | 1 | .005 |  | 40 | 0.33 | 1 | .568 |  | 36 | 1.74 | 1 | .187 |  | 21 | 12.85 | 1 | .000 |
| class weeks | 32 | 0.18 | 1 | .671 |  | 22 | 0.67 | 1 | .414 |  | 43 | 0.02 | 1 | .900 |  | 40 | 0.27 | 1 | .602 |  | 22 | 0.58 | 1 | .445 |
| delivery3 | 32 | 3.28 | 3 | .350 |  | 22 | 0.54 | 2 | .765 |  | 43 | 0.35 | 3 | .951 |  | 40 | 1.57 | 3 | .666 |  | 22 | 0.23 | 2 | .891 |
| location4 | 32 | 4.74 | 3 | .192 |  | 22 | 3.66 | 2 | .161 |  | 43 | 2.28 | 3 | .516 |  | 40 | 6.41 | 3 | .093 |  | 22 | 0.04 | 3 | .998 |
| homework | 19 | 1.49 | 1 | .223 |  | 12 | 0.40 | 1 | .526 |  | 24 | 1.43 | 1 | .232 |  | 40 | 0.19 | 1 | .911 |  | 10 | 1.94 | 1 | .164 |
| Study-design |  |  |  |  |  |  |  |  |  |  |  |  |  |  |  |  |  |  |  |  |  |  |  |  |
| ITT5 | 32 | 1.64 | 1 | .200 |  | 22 | 1.78 | 1 | .182 |  | 43 | 0.51 | 1 | .475 |  | 40 | 1.97 | 1 | .160 |  | 22 | 0.75 | 1 | .386 |
| control6 | 32 | 0.13 | 1 | .718 |  | 22 | 0.83 | 2 | .659 |  | 43 | 1.60 | 1 | .207 |  | 40 | 0.22 | 2 | .894 |  | 22 | 2.21 | 1 | .137 |

*Note. k* = number of studies. *Q* = Cochran’s Q heterogeneity statistic to test moderator effects. *df* = degrees of freedom of Cochran’s Q. 1profession categories: health care, public administration, law enforcement, industry, science, teaching, finance, marketing, phone service (call center), mixed profession. 2MBI-type categories: yoga, relaxation, psychoeducation and personal reflection, MBSR, meditation, ACT, MBCT, mixed, others. 3delivery categories: inclass, online, blended, audio. 4location categories: at work, after work, centralized, not specified. 5ITT categories: yes, no. 6control-group categories: wait-list, passive, active

**Appendix D: Table Risk of Bias Ratings for included primary studies**

|  | | Random Sequence Generation *(Selection Bias)* | | Allocation Concealment  *(Selection Bias)* | | Incomplete Outcome data *(attrition bias)* | | Selective Reporting  *(reporting bias)* | | Other Bias |  |
| --- | --- | --- | --- | --- | --- | --- | --- | --- | --- | --- | --- |
| Aikens, 2014 | | **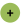** | | **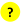** | | **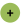** | | **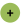** | | **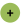** |  |
| Alexander, 2015 | | **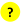** | | **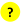** | | **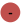** | | **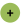** | | **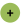** |  |
| Allexandre, 2016 | | **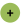** | | **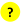** | | **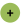** | | **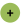** | | **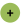** |  |
| Amutio, 2015a & Amutio 2015b | | **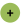** | | **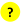** | | **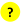** | | **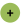** | | **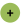** |  |
| Ancona, 2014 | | **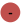** | | **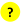** | | **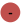** | | **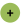** | | **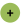** |  |
| Anderson, 1999 | | **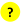** | | **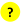** | | **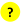** | | **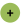** | | **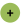** |  |
| Asueron, 2018 | | **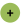** | | **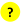** | | **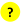** | | **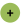** | | **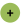** |  |
| Arredondo, 2017 | | **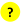** | | **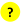** | | **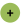** | | **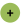** | | **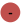** |  |
| Asuero, 2014 | | **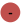** | | **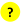** | | **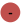** | | **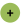** | | **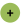** |  |
| Baby, 2018 | | **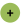** | | **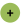** | | **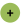** | | **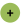** | | **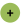** |  |
| Bartlett, 2017 | | **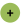** | | **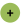** | | **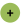** | | **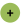** | | **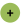** |  |
| Bostock, 2018 | | **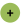** | | **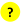** | | **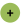** | | **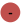** | | **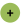** |  |
| Cheema, 2013 | | **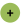** | | **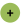** | | **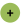** | | **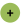** | | **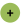** |  |
| Chin, 2019 & Slutsky, 2018 | | **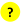** | | **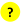** | | **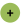** | | **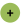** | | **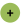** |  |
| Christopher, 2018 | | **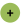** | | **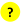** | | **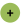** | | **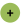** | | **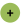** |  |
| Crain, 2017 | | **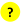** | | **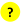** | | **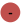** | | **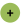** | | **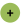** |  |
| Dwivedi, 2015 | | **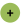** | | **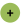** | | **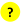** | | **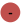** | | **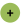** |  |
| Flaxman, 2010 | | **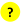** | | **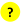** | | **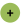** | | **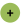** | | **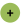** |  |
| Flook, 2013 | | **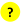** | | **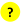** | | **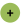** | | **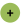** | | **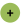** |  |
| Gregoire, 2015 | | **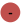** | | **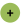** | | **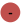** | | **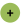** | |  |  |
| Harris, 2016 | |  | |  | |  | |  | |  |  |
| Huang, 2015 | |  | |  | |  | |  | |  |  |
| Ireland, 2017 | |  | |  | |  | |  | |  |  |
| Jennings, 2013 | |  | |  | |  | |  | |  |  |
| Klatt, 2009 | |  | |  | |  | |  | |  |  |
| Klatt, 2017 | |  | |  | |  | |  | |  |  |
| Lacerda, 2018 | |  | |  | |  | |  | |  |  |
| Lin, 2019 | |  | |  | |  | |  | |  |  |
| Mackenzie, 2006 | |  | |  | |  | |  | |  |  |
| Manotas, 2014 | |  | |  | |  | |  | |  |  |
| McConachie, 2014 | |  | |  | |  | |  | |  |  |
| Mistretta, 2018 | |  | |  | |  | |  | |  |  |
| Molek-Winiarska, 2018 | |  | |  | |  | |  | |  |  |
| Querstret, 2017 | |  | |  | |  | |  | |  |  |
| Rao, 2017 | |  | |  | |  | |  | |  |  |
| Rexroth, 2017 & Michel, 2014 | |  | |  | |  | |  | |  |  |
| Roeser, 2013 | |  | |  | |  | |  | |  |  |
| Schroeder, 2016 | |  | |  | |  | |  | |  |  |
| Sheppard, 1997 | |  | |  | |  | |  | |  |  |
| Shonin, 2014 | |  | |  | |  | |  | |  |  |
| Singh, 2018 | |  | |  | |  | |  | |  |  |
| Song, 2015 | |  | |  | |  | |  | |  |  |
| Steinberg, 2017 | |  | |  | |  | |  | |  |  |
| Strub, 2013 | |  | |  | |  | |  | |  |  |
| Tagg, 2016 | |  | |  | |  | |  | |  |  |
| Taylor, 2016 | |  | |  | |  | |  | |  |  |
| Valley, 2017 | |  | |  | |  | |  | |  |  |
| van Berkel, 2014 | |  | |  | |  | |  | |  |  |
| Verweij, 2018 | |  | |  | |  | |  | |  |  |
| Wilson, 2012 | |  | |  | |  | |  | |  |  |
| Wolever, 2012 | |  | |  | |  | |  | |  |  |
| Yang, 2018 | |  | |  | |  | |  | |  |  |
| Zolnierczyk-Zreda, 2016 | |  | |  | |  | |  | |  |  |
|  | |  |  | |  | |  | |  | |  |
| = Low Risk of Bias | = High Risk of Bias | | | | | | = Unclear Risk of Bias | | | | |

*Figure 2.* Risk of Bias Assessment for included studies. Risk of Bias was assessed by two reviewers independently. Conflicts were resolved in discussion with all authors. Blinding of participants and personnel (performance bias) and blinding of outcome assessment (detection bias) was not rated because blinding in randomized controlled trials is normally not possible.

| **Section/topic** | **#** | **Checklist item** | **Reported on page #** |
| --- | --- | --- | --- |
| **TITLE** | | |  |
| Title | 1 | Identify the report as a systematic review, meta-analysis, or both. | p. 1 |
| **ABSTRACT** | | |  |
| Structured summary | 2 | Provide a structured summary including, as applicable: background; objectives; data sources; study eligibility criteria, participants, and interventions; study appraisal and synthesis methods; results; limitations; conclusions and implications of key findings; systematic review registration number. | p. 2 |
| **INTRODUCTION** | | |  |
| Rationale | 3 | Describe the rationale for the review in the context of what is already known. | pp. 3-8 |
| Objectives | 4 | Provide an explicit statement of questions being addressed with reference to participants, interventions, comparisons, outcomes, and study design (PICOS). | pp. 3-8 |
| **METHODS** | | |  |
| Protocol and registration | 5 | Indicate if a review protocol exists, if and where it can be accessed (e.g., Web address), and, if available, provide registration information including registration number. | p. 9 |
| Eligibility criteria | 6 | Specify study characteristics (e.g., PICOS, length of follow-up) and report characteristics (e.g., years considered, language, publication status) used as criteria for eligibility, giving rationale. | pp. 9-10 |
| Information sources | 7 | Describe all information sources (e.g., databases with dates of coverage, contact with study authors to identify additional studies) in the search and date last searched. | p. 9 |
| Search | 8 | Present full electronic search strategy for at least one database, including any limits used, such that it could be repeated. | p. 9 |
| Study selection | 9 | State the process for selecting studies (i.e., screening, eligibility, included in systematic review, and, if applicable, included in the meta-analysis). | Fig. 1 |
| Data collection process | 10 | Describe method of data extraction from reports (e.g., piloted forms, independently, in duplicate) and any processes for obtaining and confirming data from investigators. | pp. 10-11 |
| Data items | 11 | List and define all variables for which data were sought (e.g., PICOS, funding sources) and any assumptions and simplifications made. | pp. 10-11 & Table 1 |
| Risk of bias in individual studies | 12 | Describe methods used for assessing risk of bias of individual studies (including specification of whether this was done at the study or outcome level), and how this information is to be used in any data synthesis. | p. 12 |
| Summary measures | 13 | State the principal summary measures (e.g., risk ratio, difference in means). | p. 11 |
| Synthesis of results | 14 | Describe the methods of handling data and combining results of studies, if done, including measures of consistency (e.g., I2) for each meta-analysis. | p. 12 |

Page 1 of 2

| **Section/topic** | **#** | **Checklist item** | **Reported on page #** |
| --- | --- | --- | --- |
| Risk of bias across studies | 15 | Specify any assessment of risk of bias that may affect the cumulative evidence (e.g., publication bias, selective reporting within studies). | p. 12 |
| Additional analyses | 16 | Describe methods of additional analyses (e.g., sensitivity or subgroup analyses, meta-regression), if done, indicating which were pre-specified. | p. 12 |
| **RESULTS** | | |  |
| Study selection | 17 | Give numbers of studies screened, assessed for eligibility, and included in the review, with reasons for exclusions at each stage, ideally with a flow diagram. | p.13 & Figure 1 |
| Study characteristics | 18 | For each study, present characteristics for which data were extracted (e.g., study size, PICOS, follow-up period) and provide the citations. | Table 2, App. A |
| Risk of bias within studies | 19 | Present data on risk of bias of each study and, if available, any outcome level assessment (see item 12). | p. 17 |
| Results of individual studies | 20 | For all outcomes considered (benefits or harms), present, for each study: (a) simple summary data for each intervention group (b) effect estimates and confidence intervals, ideally with a forest plot. | App. B |
| Synthesis of results | 21 | Present results of each meta-analysis done, including confidence intervals and measures of consistency. | Table 3 |
| Risk of bias across studies | 22 | Present results of any assessment of risk of bias across studies (see Item 15). | p. 17 |
| Additional analysis | 23 | Give results of additional analyses, if done (e.g., sensitivity or subgroup analyses, meta-regression [see Item 16]). | pp. 15-17 |
| **DISCUSSION** | | |  |
| Summary of evidence | 24 | Summarize the main findings including the strength of evidence for each main outcome; consider their relevance to key groups (e.g., healthcare providers, users, and policy makers). | pp. 19-20 |
| Limitations | 25 | Discuss limitations at study and outcome level (e.g., risk of bias), and at review-level (e.g., incomplete retrieval of identified research, reporting bias). | pp. 24-26 |
| Conclusions | 26 | Provide a general interpretation of the results in the context of other evidence, and implications for future research. | p. 27 |
| **FUNDING** | | |  |
| Funding | 27 | Describe sources of funding for the systematic review and other support (e.g., supply of data); role of funders for the systematic review. | Title page |

*From:*  Moher D, Liberati A, Tetzlaff J, Altman DG, The PRISMA Group (2009). Preferred Reporting Items for Systematic Reviews and Meta-Analyses: The PRISMA Statement. PLoS Med 6(7): e1000097. doi:10.1371/journal.pmed1000097

For more information, visit: **www.prisma-statement.org**.

Page 2 of
